# Supplementary material for: High-Throughput SuperSAGE for Digital Gene Expression Analysis of Multiple Samples Using Next Generation Sequencing
Source: PLoS One. 2010 Aug 6;5(8):e12010. doi: 10.1371/journal.pone.0012010 (PMC2917361; doi:10.1371/journal.pone.0012010)
Supplement: Table S5 — Transcript amount of Arabidopsis genes analyzed by tag extraction using three different anchoring enzymes (NlaIII, DpnII, BfaI). (3.45 MB XLS) [file pone.0012010.s008.xls]

## Sheet: Sheet1
Table S5 Transcript amount of Arabidopsis genes analyzed by tag extraction using three different anchoring enzymes (NlaIII, DpnII, BfaI)
	normalized tag count (Arabidopsis leaf)*					normalized tag count (Arabidopsis stem)*
Gene ID	NlaIII (s1)	DpnII (s2)	BfaI (s3)	(average)		NlaIII (t1)	DpnII (t2)	BfaI (t3)	(average)
AT2G39730	15145.5	32156.7	14854.5	20718.9		4763.82	9075.68	3374.58	5738.03
AT3G14420	5606.27	15441.8	34660.6	18569.5		2293.03	4969.26	10193.6	5818.61
AT1G20620	10565.7	9597	18718.2	12960.3		27249.8	20356.4	39160.6	28922.3
AT3G54890	14426.8	13597.2	37.5115	9353.82		13011.6	10489.8	0	7833.8
AT1G61520	10223.5	9244.05	8880.84	9449.47		7050.93	6183.61	6578.49	6604.34
AT3G15353	6779.27	3916.11	15801.7	8832.37		2755.2	2684.36	6438.85	3959.47
AT4G38970	10217.8	3487.53	6264.42	6656.58		3294.39	1209.03	2071.29	2191.57
AT2G21330	5744.27	7349.02	8088.41	7060.57		1262.06	1821.53	1815.29	1632.96
AT1G79040	10672	16.8074	3010.3	4566.38		6144.38	0	2067.41	2737.27
AT5G09660	3783.51	6672.52	4895.25	5117.09		853.222	2652.4	1365.35	1623.66
AT1G06680	3967.51	4907.75	6311.31	5062.19		3087	3270.23	3847.79	3401.68
AT2G30570	2162.01	3096.76	8758.93	4672.56		1587.94	2532.56	6283.7	3468.07
AT2G05520	7262.27	3353.07	0	3538.45		6114.76	2077.18	0	2730.65
AT4G22890	3921.51	3853.09	3221.3	3665.3		1576.09	1715.01	1388.62	1559.91
AT3G47470	4922.02	4970.78	14.0668	3302.29		4272.04	4055.83	3.87883	2777.25
AT4G12800	2469.63	5529.62	2766.47	3588.58		2002.7	4689.63	2443.66	3045.33
AT2G13360	3881.26	1260.55	4895.25	3345.69		793.971	420.762	1629.11	947.946
AT5G02380	2932.51	4096.79	3268.19	3432.5		3161.07	4165.01	3708.16	3678.08
AT1G23310	5244.02	3592.57	46.8894	2961.16		1380.56	942.72	19.3941	780.892
AT1G29930	4965.14	3987.55	0	2984.23		6985.76	5267.52	0	4084.42
AT4G35090	299.001	176.477	11619.2	4031.55		5.92515	10.6522	1458.44	491.672
AT5G14740	4096.89	4916.15	0	3004.35		1199.84	639.132	0	612.992
AT2G25510	3823.76	2790.02	2644.56	3086.11		3122.56	1600.49	1854.08	2192.38
AT4G10340	2926.76	4012.76	2410.11	3116.54		2420.43	3464.63	2187.66	2690.9
AT2G45960	4683.39	1865.62	1805.24	2784.75		3715.07	1493.97	1338.19	2182.41
AT2G26500	4571.26	3542.15	0	2704.47		3540.28	2322.18	0	1954.15
AT3G44310	2949.76	3033.73	3165.03	3049.51		1404.26	567.23	1532.14	1167.88
AT1G07890	4140.01	3966.54	56.2672	2720.94		3365.49	5176.97	93.0918	2878.52
AT5G60390	3728.89	4437.14	0	2722.01		2296	2889.41	0	1728.47
AT1G29910	3898.51	2189.16	1561.42	2549.7		3626.19	2250.28	1912.26	2596.24
AT3G61470	3708.76	2848.85	1008.12	2521.91		3510.65	3187.67	1105.47	2601.26
AT4G02770	3777.76	2348.83	1387.93	2504.84		4026.14	1744.3	1318.8	2363.08
AT4G05050	1198.88	1928.64	5908.06	3011.86		1750.88	2220.99	7924.44	3965.44
AT1G44575	4079.64	1592.5	1566.1	2412.75		2192.31	1081.2	1206.31	1493.27
AT1G31330	1150	3508.54	3755.84	2804.79		708.056	2697.67	2342.81	1916.18
AT1G07590	25.8751	8206.19	0	2744.02		8.88773	4234.25	0	1414.38
AT1G07600	8.62503	8201.99	0	2736.87		2.96258	4231.59	0	1411.52
AT5G66570	3360.89	3130.37	18.7557	2170		2287.11	2122.45	3.87883	1471.15
AT5G19140	2898.01	2075.71	1537.97	2170.56		2755.2	2178.38	1970.44	2301.34
AT4G25100	3116.51	3008.52	14.0668	2046.36		237.006	276.957	0	171.321
AT3G15840	1644.51	2336.22	3132.21	2370.98		746.569	990.655	1504.98	1080.74
AT1G43170	3300.51	2033.69	750.23	2028.14		1667.93	287.61	527.52	827.687
AT4G33010	2173.51	2252.19	2297.58	2241.09		521.414	505.98	566.309	531.234
AT1G13440	3829.51	1655.52	9.37787	1831.47		6399.17	3509.9	7.75765	3305.61
AT5G02370	2923.88	0	3272.88	2065.59		3149.22	2.66305	3712.04	2287.97
AT5G35630	3312.01	1953.86	0	1755.29		853.222	1238.32	11.6365	701.059
AT4G03280	2472.51	1722.75	1219.12	1804.8		1469.44	974.677	783.523	1075.88
AT5G01530	1848.63	2584.13	1266.01	1899.59		2058.99	1890.77	1163.65	1704.47
AT4G13940	2512.76	1592.5	1256.63	1787.3		5966.63	4516.54	5872.54	5451.9
AT1G12900	3475.89	1096.68	187.557	1586.71		2115.28	838.861	128.001	1027.38
AT5G41700	2360.38	0	3094.7	1818.36		3626.19	0	4887.32	2837.84
AT1G30380	2052.76	1752.17	1495.77	1766.9		2106.39	1693.7	1485.59	1761.89
AT1G55670	1397.25	2705.98	1416.06	1839.77		1315.38	2710.99	1586.44	1870.94
AT2G46820	2392.01	4.20184	2682.07	1692.76		829.521	0	1900.62	910.049
AT4G37930	3162.51	365.56	900.276	1476.12		1970.11	218.37	574.066	920.85
AT1G23130	603.752	1958.06	3127.52	1896.44		2.96258	7.98916	42.6671	17.8729
AT5G13630	1535.25	1437.03	2044.38	1672.22		805.821	1033.26	1070.56	969.88
AT5G64040	3415.51	352.955	0	1256.16		2334.51	69.2394	7.75765	803.836
AT5G66190	1713.51	1470.64	1519.22	1567.79		1036.9	1107.83	721.462	955.398
AT3G16640	2147.63	2155.54	0	1434.39		2082.69	2703	0	1595.23
AT5G54270	1451.88	42.0184	3455.75	1649.88		1949.38	53.261	5201.5	2401.38
AT3G26650	1762.38	785.744	2100.64	1549.59		690.28	474.023	1109.34	757.883
AT2G45180	1681.88	995.836	1941.22	1539.65		302.183	284.947	554.672	380.6
AT5G64400	1104	1344.59	2494.51	1647.7		953.95	894.785	1846.32	1231.69
AT1G01100	0	2941.29	2475.76	1805.68		11.8503	1118.48	1303.29	811.206
AT1G42970	1676.13	1546.28	1190.99	1471.13		539.189	545.926	500.368	528.494
AT2G47400	1523.75	1680.74	1233.19	1479.23		888.773	1366.15	837.826	1030.92
AT2G38170	1201.75	1298.37	2138.15	1546.09		411.798	447.393	488.732	449.308
AT1G15820	2159.13	1794.19	4.68894	1319.34		1724.22	1408.75	0	1044.32
AT5G04140	1903.26	1554.68	647.073	1368.34		728.794	388.806	302.548	473.383
AT4G40030	1052.25	2105.12	1364.48	1507.29		1244.28	1302.23	1396.38	1314.3
AT1G13930	1095.38	1159.71	2208.49	1487.86		1706.44	2082.51	3626.7	2471.88
AT1G52220	1043.63	806.753	2574.23	1474.87		1270.95	1030.6	1966.56	1422.7
AT1G68010	2047.01	1579.89	70.334	1232.41		604.366	316.903	15.5153	312.261
AT1G20340	1647.38	2214.37	4.68894	1288.81		1279.83	1411.42	0	897.084
AT5G60360	1819.88	1966.46	0	1262.11		1342.05	1717.67	0	1019.91
AT1G08570	1564	1369.8	1050.32	1328.04		462.162	452.719	356.852	423.911
AT1G04270	1104	1495.85	1537.97	1379.28		728.794	655.111	915.403	766.436
AT5G67030	2064.26	1294.17	18.7557	1125.73		545.114	399.458	0	314.857
AT3G02470	155.25	378.166	4013.73	1515.72		272.557	330.218	2094.57	899.114
AT4G14710	1000.5	924.405	1988.11	1304.34		616.216	585.871	1458.44	886.842
AT3G21055	1630.13	1479.05	337.603	1148.93		1345.01	1368.81	391.761	1035.19
AT1G20020	1526.63	1916.04	0	1147.56		1190.96	1406.09	0	865.682
AT1G03130	1239.13	1193.32	1190.99	1207.81		1045.79	801.579	585.703	811.024
AT5G02500	1155.75	1798.39	647.073	1200.4		983.575	1760.28	946.433	1230.1
AT1G52230	405.376	760.533	3019.67	1395.19		245.894	764.296	2513.48	1174.56
AT5G58330	1526.63	869.781	1012.81	1136.41		551.039	471.36	500.368	507.589
AT1G32060	1926.26	529.432	703.34	1053.01		669.542	183.751	345.215	399.503
AT3G08940	11.5	2327.82	1706.77	1348.7		47.4012	2529.9	1613.59	1396.96
AT3G61440	822.253	1247.95	1556.73	1208.98		942.099	1001.31	1124.86	1022.76
AT4G04640	940.128	689.102	1974.04	1201.09		669.542	271.631	818.432	586.535
AT1G08380	2.87501	1932.85	2067.82	1334.51		2.96258	1203.7	1140.37	782.346
AT3G13920	741.752	1021.05	1870.89	1211.23		577.702	774.948	1501.11	951.252
AT3G08580	1426	958.019	778.363	1054.13		1937.53	1235.66	1217.95	1463.71
AT2G41430	0	3075.75	731.474	1269.07		5.92515	4386.05	682.673	1691.55
AT5G42980	960.253	2315.21	4.68894	1093.39		186.642	1158.43	0	448.357
AT4G26850	899.878	575.652	1945.91	1140.48		266.632	106.522	449.944	274.366
AT1G47128	991.878	924.405	1392.61	1102.97		598.44	796.253	1175.28	856.659
AT2G27710	1474.88	1411.82	0	962.233		524.376	519.295	0	347.89
AT3G09390	1124.13	760.533	1270.7	1051.79		897.661	447.393	663.279	669.444
AT4G39260	868.253	2264.79	0	1044.35		1084.3	3661.7	0	1582
AT1G26630	1276.5	1663.93	0	980.144		1593.87	1746.96	0	1113.61
AT3G60750	1089.63	1302.57	693.963	1028.72		613.253	505.98	252.124	457.119
AT1G11840	589.377	966.423	1875.57	1143.79		2073.8	2862.78	4483.92	3140.17
AT2G30520	448.501	1210.13	1772.42	1143.68		115.54	375.49	546.914	345.982
AT3G16130	1380	1420.22	0	933.409		956.912	1299.57	0	752.161
AT5G14320	615.252	613.469	2147.53	1125.42		124.428	260.979	954.191	446.533
AT3G16140	1382.88	1403.41	0	928.765		945.062	1286.25	3.87883	745.065
AT1G06040	1357	1378.2	46.8894	927.366		1623.49	985.329	69.8189	892.88
AT5G60600	991.878	1021.05	1012.81	1008.58		284.407	199.729	325.821	269.986
AT3G61430	966.003	1159.71	881.52	1002.41		485.863	671.089	504.247	553.733
AT1G60950	11.5	1953.86	1537.97	1167.78		8.88773	1677.72	1062.8	916.47
AT1G01060	911.378	1142.9	975.299	1009.86		204.418	223.696	178.426	202.18
AT3G09200	822.253	1336.18	900.276	1019.57		337.734	394.132	426.671	386.179
AT3G56940	1302.38	1357.19	9.37787	889.65		524.376	673.752	0	399.376
AT2G06520	5.75002	1815.19	1580.17	1133.71		2.96258	1789.57	1536.01	1109.52
AT3G62410	1043.63	840.368	951.854	945.283		248.856	218.37	275.397	247.541
AT3G53420	11.5	3184.99	9.37787	1068.62		5.92515	1592.51	7.75765	535.396
AT5G46110	2081.51	0	93.7787	725.095		2298.96	53.261	155.153	835.791
AT1G56220	1380	1075.67	18.7557	824.81		1718.29	1928.05	0	1215.45
AT3G63490	1006.25	142.863	1612.99	920.703		444.387	106.522	457.701	336.203
AT2G45070	851.003	399.175	1519.22	923.131		1025.05	873.481	3459.91	1786.15
AT3G06700	1302.38	983.23	126.601	804.07		675.467	535.273	174.547	461.763
AT5G44580	296.126	1100.88	1594.24	997.082		216.268	615.165	802.917	544.783
AT5G53300	1184.5	210.092	1106.59	833.728		1096.15	218.37	1962.69	1092.4
AT1G73600	1000.5	1084.07	375.115	819.898		272.557	308.914	186.184	255.885
AT2G42600	1006.25	495.817	1012.81	838.293		207.38	205.055	368.488	260.308
AT2G43970	851.003	680.698	1012.81	848.17		675.467	362.175	620.612	552.752
AT3G14415	690.002	1361.4	497.027	849.475		248.856	505.98	128.001	294.279
AT5G50920	1003.38	991.634	389.182	794.731		462.162	340.871	128.001	310.345
AT5G15950	230.001	512.624	2185.04	975.89		35.5509	79.8916	550.793	222.079
AT4G40040	0	907.597	2081.89	996.495		5.92515	1139.79	2187.66	1111.12
AT4G15000	1032.13	621.872	712.718	788.906		556.964	282.284	581.824	473.691
AT1G54040	1219	680.698	337.603	745.768		918.399	788.263	442.186	716.283
AT1G74470	577.877	802.551	1237.88	872.769		391.06	556.578	671.037	539.558
AT4G19170	842.378	718.515	862.764	807.885		145.166	127.826	162.911	145.301
AT4G16990	713.002	672.294	1101.9	829.066		260.707	234.349	581.824	358.96
AT1G01140	1112.63	668.092	450.138	743.62		311.071	215.707	174.547	233.775
AT4G20360	876.878	1029.45	417.315	774.548		171.829	199.729	135.759	169.106
AT5G45350	396.751	529.432	1716.15	880.778		189.605	463.371	1163.65	605.541
AT1G69530	977.503	285.725	1040.94	768.057		237.006	117.174	232.73	195.637
AT5G54940	115	1554.68	1022.19	897.29		136.279	1262.29	1016.25	804.939
AT3G13460	828.003	890.79	600.184	772.992		260.707	521.958	480.974	421.213
AT3G26520	609.502	1735.36	0	781.621		675.467	1901.42	0	858.962
AT3G04400	2.87501	1008.44	1786.48	932.6		2.96258	561.904	981.343	515.403
AT5G47210	569.252	390.771	1533.28	831.102		343.659	215.707	721.462	426.943
AT2G25080	813.628	575.652	919.031	769.437		121.466	119.837	201.699	147.667
AT1G15930	776.252	831.964	693.963	767.393		355.509	490.002	395.64	413.717
AT2G30950	707.252	352.955	1341.04	800.414		254.782	141.142	659.4	351.775
AT4G31700	856.753	403.377	1031.57	763.898		195.53	159.783	372.367	242.56
AT3G11930	1058	638.68	431.382	709.355		272.557	330.218	387.883	330.219
AT1G19660	695.752	512.624	1134.72	781.033		207.38	319.566	667.158	398.035
AT1G56070	382.376	310.936	1856.82	850.044		281.445	237.012	1078.31	532.257
AT3G56290	554.877	831.964	984.677	790.506		100.728	79.8916	112.486	97.7017
AT5G57345	270.251	621.872	1655.19	849.106		68.1393	181.088	500.368	249.865
AT1G15690	494.502	1037.85	815.875	782.744		989.501	1608.48	1621.35	1406.44
AT1G70700	828.003	1021.05	281.336	710.129		835.447	862.829	349.094	682.457
AT1G18730	632.502	613.469	1050.32	765.431		426.611	271.631	729.219	475.821
AT4G02890	1322.5	542.037	0	621.514		2121.2	937.394	0	1019.53
AT1G70490	621.002	466.404	1195.68	761.028		1688.67	1190.38	2536.75	1805.27
AT5G64940	885.503	470.606	740.852	698.987		248.856	197.066	240.487	228.803
AT1G62750	793.502	609.267	726.785	709.851		183.68	127.826	120.244	143.917
AT3G12780	753.252	836.166	525.161	704.86		402.91	495.328	341.337	413.192
AT4G16190	1457.63	231.101	0	562.91		918.399	130.49	0	349.629
AT3G54500	954.503	479.01	525.161	652.891		272.557	143.805	263.76	226.707
AT1G72930	868.253	344.551	797.119	669.974		669.542	223.696	558.551	483.93
AT2G25450	678.502	453.799	970.61	700.97		441.424	521.958	748.613	570.665
AT2G04030	856.753	647.083	459.516	654.451		171.829	122.5	131.88	142.07
AT1G54410	1141.38	626.074	0	589.151		1265.02	671.089	0	645.37
AT4G34350	747.502	722.716	529.85	666.69		242.931	191.74	143.517	192.729
AT3G58610	948.753	403.377	553.294	635.141		213.306	229.022	186.184	209.504
AT4G32260	853.878	550.441	539.228	647.849		305.145	268.968	461.58	345.231
AT4G32940	724.502	663.891	618.94	669.111		767.307	567.23	484.853	606.464
AT1G37130	161.001	840.368	1336.35	779.238		5.92515	162.446	193.941	120.771
AT2G21170	569.252	865.579	637.695	690.842		462.162	820.22	705.946	662.776
AT5G42530	365.126	0	1936.53	767.219		272.557	0	1497.23	589.928
AT2G22990	71.8752	1890.83	276.647	746.45		29.6258	705.709	81.4553	272.263
AT5G64840	511.752	651.285	942.476	701.838		219.231	226.359	356.852	267.481
AT3G26570	851.003	487.413	553.294	630.57		385.135	250.327	411.156	348.872
AT5G26742	920.003	739.524	131.29	596.939		290.333	215.707	38.7883	181.609
AT5G04800	816.503	386.569	656.451	619.841		319.958	234.349	325.821	293.376
AT5G61410	149.5	1735.36	234.447	706.436		106.653	729.676	147.395	327.908
AT1G66200	845.253	920.203	0	588.485		539.189	402.121	0	313.77
AT3G49910	715.877	575.652	572.05	621.193		402.91	359.512	267.639	343.354
AT4G20260	839.503	470.606	468.894	593.001		1860.5	894.785	729.219	1161.5
AT1G09070	701.502	869.781	243.825	605.036		551.039	553.915	232.73	445.895
AT3G01060	793.502	340.349	675.207	603.019		195.53	79.8916	174.547	149.99
AT3G02468	77.6252	189.083	2006.86	757.858		136.279	165.109	1047.28	449.557
AT1G02780	554.877	840.368	468.894	621.379		399.948	639.132	352.973	464.018
AT4G32020	859.628	336.147	529.85	575.208		1650.16	788.263	1047.28	1161.9
AT3G01500	759.002	352.955	670.518	594.158		494.75	215.707	473.217	394.558
AT1G51400	876.878	773.138	0	550.005		965.8	790.926	0	585.575
AT1G44446	577.877	642.881	633.006	617.922		373.285	367.501	325.821	355.536
AT1G75380	40.2501	1979.07	14.0668	677.794		0	1797.56	0	599.187
AT5G17920	874.003	554.643	234.447	554.364		5433.37	4271.54	3126.33	4277.08
AT5G15200	391.001	487.413	1078.46	652.29		373.285	591.198	1020.13	661.538
AT2G37220	1083.88	96.6423	384.493	521.671		275.52	13.3153	112.486	133.774
AT1G07320	336.376	613.469	1012.81	654.218		124.428	229.022	341.337	231.596
AT1G76990	876.878	260.514	520.472	552.621		562.89	255.653	232.73	350.424
AT2G28800	575.002	752.129	459.516	595.549		337.734	434.077	197.82	323.21
AT1G72370	839.503	613.469	173.491	542.154		302.183	495.328	310.306	369.272
AT2G46830	638.252	546.239	534.539	573.01		154.054	143.805	224.972	174.277
AT3G63410	609.502	537.835	581.428	576.255		373.285	255.653	221.093	283.344
AT1G52400	488.752	680.698	618.94	596.13		509.563	521.958	636.127	555.883
AT2G35940	465.751	357.156	1012.81	611.906		444.387	359.512	837.826	547.242
AT1G64230	816.503	747.927	0	521.477		604.366	703.046	0	435.804
AT1G03680	437.001	546.239	839.32	607.52		177.755	197.066	349.094	241.305
AT4G35750	468.626	647.083	665.829	593.846		142.204	258.316	442.186	280.902
AT4G05180	74.7502	1521.07	328.226	641.347		74.0644	1054.57	221.093	449.909
AT1G62180	658.377	386.569	642.384	562.444		118.503	125.163	170.668	138.112
AT3G51600	575.002	411.78	745.541	577.441		633.991	455.382	833.947	641.107
AT3G51730	583.627	592.459	515.783	563.956		266.632	426.088	457.701	383.474
AT5G49730	17.2501	672.294	1317.59	669.045		0	98.5329	325.821	141.451
AT4G29060	925.753	432.789	103.157	487.233		136.279	178.424	34.9094	116.537
AT4G25080	543.377	567.248	567.361	559.329		311.071	364.838	469.338	381.749
AT5G45775	189.751	302.532	1434.81	642.366		195.53	229.022	814.553	413.035
AT5G13650	195.501	25.211	1734.91	651.873		82.9521	0	240.487	107.813
AT3G26740	638.252	584.056	379.804	534.037		251.819	239.675	197.82	229.771
AT4G15530	17.2501	1063.07	848.697	643.004		17.7755	415.436	329.7	254.304
AT3G05560	940.128	453.799	14.0668	469.331		311.071	199.729	0	170.266
AT1G07770	586.502	462.202	572.05	540.251		462.162	575.219	558.551	531.977
AT2G42590	1000.5	365.56	0	455.354		853.222	479.349	0	444.19
AT4G36040	439.876	407.578	862.764	570.073		79.9896	90.5438	205.578	125.37
AT1G03630	615.252	546.239	422.004	527.832		396.985	378.153	294.791	356.643
AT3G53740	897.003	508.423	0	468.475		1090.23	335.545	0	475.258
AT1G08110	460.001	319.34	919.031	566.124		296.258	426.088	636.127	452.824
AT5G10360	465.751	176.477	1069.08	570.435		225.156	82.5546	527.52	278.41
AT5G02870	258.751	411.78	1134.72	601.751		278.482	191.74	418.913	296.378
AT3G26510	0	1029.45	867.453	632.301		0	55.9241	19.3941	25.1061
AT2G37760	641.127	504.221	398.56	514.636		103.69	226.359	77.5765	135.875
AT2G18020	508.877	252.11	881.52	547.502		278.482	250.327	368.488	299.099
AT1G54780	799.252	609.267	0	469.506		420.686	428.751	3.87883	284.439
AT4G16720	641.127	289.927	609.562	513.539		284.407	178.424	368.488	277.107
AT3G13062	598.002	306.734	661.14	521.959		106.653	127.826	46.5459	93.6751
AT3G59060	414.001	689.102	525.161	542.755		130.353	404.784	356.852	297.33
AT3G49010	586.502	420.184	539.228	515.304		829.521	599.187	116.365	515.024
AT4G10120	529.002	773.138	234.447	512.196		35.5509	42.6088	0	26.0533
AT3G45140	848.128	4.20184	572.05	474.793		14.8129	23.9675	7.75765	15.5127
AT3G55800	802.128	563.047	14.0668	459.747		228.118	170.435	0	132.851
AT5G20290	695.752	638.68	84.4008	472.944		521.414	404.784	34.9094	320.369
AT1G49960	1104	0	131.29	411.765		479.937	0	69.8189	183.252
AT1G25440	580.752	361.358	581.428	507.846		275.52	173.098	271.518	240.045
AT2G24270	327.751	529.432	787.741	548.308		568.815	948.047	1241.22	919.362
AT5G39740	437.001	277.321	876.831	530.385		151.091	135.816	387.883	224.93
AT3G55280	163.876	655.487	900.276	573.213		195.53	239.675	263.76	232.988
AT5G02790	431.251	521.028	600.184	517.488		305.145	391.469	384.004	360.206
AT5G26000	517.502	647.083	318.848	494.478		2506.34	2684.36	2110.08	2433.59
AT1G01490	362.251	394.973	853.386	536.87		177.755	191.74	349.094	239.53
AT3G62250	894.128	378.166	0	424.098		432.536	215.707	0	216.081
AT3G22230	8.62503	508.423	1298.84	605.294		0	205.055	368.488	191.181
AT1G09130	350.751	428.588	825.253	534.864		115.54	117.174	325.821	186.179
AT4G35450	0	1008.44	750.23	586.224		8.88773	777.611	325.821	370.773
AT3G18490	577.877	453.799	422.004	484.56		666.58	476.686	434.428	525.898
AT1G67740	54.6252	71.4313	1697.39	607.817		65.1767	74.5655	1163.65	434.463
AT3G02090	362.251	487.413	731.474	527.046		385.135	442.067	806.796	544.666
AT3G22890	373.751	373.964	834.631	527.448		574.74	732.339	1334.32	880.465
AT5G54760	477.251	310.936	703.34	497.176		468.087	420.762	1016.25	635.034
AT1G56280	586.502	537.835	248.514	457.617		1090.23	727.013	500.368	772.537
AT2G01250	212.751	756.331	609.562	526.214		219.231	500.654	395.64	371.842
AT3G24170	543.377	668.092	168.802	460.09		337.734	231.686	104.728	224.716
AT4G38740	753.252	508.423	0	420.558		838.409	466.034	0	434.814
AT4G09760	511.752	655.487	225.069	464.102		293.295	591.198	186.184	356.892
AT2G34480	908.503	273.12	0	393.874		376.247	199.729	0	191.992
AT5G38410	0	12.6055	1772.42	595.008		8.88773	0	1047.28	352.057
AT2G47115	316.251	672.294	515.783	501.443		91.8399	404.784	279.275	258.633
AT3G17800	718.752	336.147	234.447	429.782		290.333	85.2177	116.365	163.972
AT2G47110	313.376	672.294	515.783	500.484		82.9521	404.784	279.275	255.67
AT2G38230	388.126	449.597	642.384	493.369		53.3264	103.859	128.001	95.0622
AT4G29350	724.502	142.863	431.382	432.916		1350.93	229.022	581.824	720.594
AT2G46600	514.627	277.321	604.873	465.607		468.087	252.99	682.673	467.917
AT4G14880	615.252	16.8074	731.474	454.511		331.809	0	752.492	361.434
AT5G40370	264.501	705.909	534.539	501.65		432.536	1251.63	1159.77	947.98
AT1G09340	626.752	634.478	18.7557	426.662		257.744	316.903	0	191.549
AT4G33865	537.627	777.34	0	438.322		281.445	316.903	0	199.449
AT1G01550	442.751	294.129	693.963	476.948		456.237	458.045	961.949	625.41
AT5G41520	241.501	445.395	844.008	510.301		171.829	223.696	519.763	305.096
AT1G49970	557.752	340.349	445.449	447.85		239.969	135.816	213.335	196.373
AT4G30950	356.501	210.092	914.343	493.645		136.279	79.8916	356.852	191.007
AT3G16080	414.001	424.386	572.05	470.146		219.231	135.816	100.849	151.965
AT4G18100	813.628	21.0092	356.359	396.999		414.761	18.6414	166.789	200.064
AT5G42270	462.876	613.469	267.269	447.871		204.418	226.359	128.001	186.259
AT5G06980	592.252	394.973	300.092	429.106		177.755	191.74	224.972	198.155
AT1G07930	5.75002	1521.07	0	508.939		0	436.741	0	145.58
AT3G47070	629.627	605.065	0	411.564		231.081	290.273	0	173.785
AT1G30230	983.253	16.8074	75.023	358.361		793.971	0	31.0306	275
AT2G41840	376.626	525.23	492.338	464.731		165.904	247.664	128.001	180.523
AT2G34860	644.002	210.092	393.871	415.988		195.53	117.174	108.607	140.437
AT1G15270	462.876	542.037	314.159	439.691		402.91	455.382	403.398	420.563
AT1G70410	612.377	491.615	126.601	410.198		355.509	167.772	34.9094	186.064
AT4G24770	414.001	546.239	379.804	446.681		165.904	194.403	89.213	149.84
AT2G45740	319.126	592.459	478.271	463.286		248.856	207.718	279.275	245.283
AT5G10450	51.7502	1168.11	262.58	494.147		11.8503	841.524	349.094	400.823
AT3G45780	230.001	344.551	890.898	488.483		112.578	111.848	457.701	227.376
AT5G62000	379.501	605.065	351.67	445.412		257.744	455.382	325.821	346.316
AT5G51110	460.001	436.991	393.871	430.288		162.942	165.109	124.122	150.724
AT5G15948	155.25	256.312	1092.52	501.362		26.6632	39.9458	275.397	114.002
AT3G04120	632.502	508.423	32.8226	391.249		734.719	588.534	19.3941	447.549
AT1G64360	419.751	0	937.787	452.513		115.54	0	166.789	94.11
AT2G19730	0	1021.05	478.271	499.773		0	607.176	290.912	299.363
AT4G13770	592.252	344.551	262.58	399.794		1004.31	1070.55	1035.65	1036.84
AT1G73602	500.252	542.037	187.557	409.949		136.279	154.457	93.0918	127.942
AT5G47930	508.877	302.532	426.693	412.701		210.343	135.816	236.608	194.256
AT4G32470	11.5	0	1575.48	528.994		29.6258	0	1536.01	521.88
AT5G30510	641.127	344.551	150.046	378.575		257.744	170.435	108.607	178.929
AT2G27530	287.501	958.019	28.1336	424.551		177.755	511.306	7.75765	232.273
AT5G59780	353.626	415.982	520.472	430.027		97.765	95.8699	162.911	118.849
AT1G64720	658.377	0	482.96	380.446		293.295	0	205.578	166.291
AT2G21870	500.252	369.762	328.226	399.413		716.944	500.654	380.125	532.574
AT5G03850	281.751	352.955	698.651	444.452		186.642	178.424	438.307	267.791
AT4G01610	299.001	268.918	759.608	442.509		361.434	324.892	736.977	474.435
AT5G19510	506.002	247.909	445.449	399.786		370.322	239.675	341.337	317.111
AT5G03240	20.1251	1310.97	42.2004	457.766		148.129	4106.43	128.001	1460.85
AT3G53890	632.502	453.799	0	362.1		272.557	319.566	0	197.374
AT5G05690	155.25	352.955	886.209	464.805		97.765	103.859	139.638	113.754
AT2G39800	241.501	731.12	318.848	430.489		59.2515	122.5	38.7883	73.5134
AT2G28000	543.377	399.175	192.246	378.266		85.9147	58.5871	65.94	70.1473
AT5G09220	491.627	252.11	436.071	393.269		551.039	490.002	671.037	570.693
AT1G21000	460.001	403.377	318.848	394.075		112.578	90.5438	46.5459	83.2225
AT1G23290	572.127	521.028	0	364.385		299.22	215.707	0	171.642
AT1G67870	563.502	193.285	370.426	375.737		420.686	245.001	376.246	347.311
AT4G21280	69.0002	1016.85	253.203	446.349		29.6258	889.459	271.518	396.868
AT3G62870	345.001	327.743	567.361	413.369		168.867	162.446	325.821	219.045
AT2G19480	460.001	655.487	9.37787	374.955		254.782	372.827	0	209.203
AT4G08390	543.377	479.01	70.334	364.24		311.071	271.631	58.1824	213.628
AT1G32070	365.126	407.578	436.071	402.925		237.006	151.794	256.002	214.934
AT3G53460	465.751	105.046	609.562	393.453		85.9147	42.6088	116.365	81.6294
AT3G44010	609.502	436.991	0	348.831		411.798	290.273	11.6365	237.902
AT2G34470	385.251	0	853.386	412.879		165.904	0	325.821	163.909
AT1G64370	776.252	96.6423	98.4677	323.787		157.017	18.6414	23.273	66.3103
AT1G11860	626.752	394.973	9.37787	343.701		367.36	553.915	23.273	314.849
AT3G08610	347.876	256.312	618.94	407.709		450.312	322.229	709.825	494.122
AT4G34620	897.003	4.20184	0	300.402		485.863	0	0	161.954
AT4G31990	345.001	155.468	726.785	409.085		248.856	245.001	857.22	450.359
AT4G02920	793.502	151.266	0	314.923		242.931	127.826	0	123.586
AT2G23090	434.126	668.092	0	367.406		545.114	804.242	0	449.785
AT2G05620	255.876	323.542	675.207	418.208		109.615	165.109	252.124	175.616
AT4G11570	299.001	474.808	431.382	401.73		154.054	260.979	279.275	231.436
AT4G15545	310.501	537.835	337.603	395.313		106.653	181.088	201.699	163.146
AT4G26530	350.751	781.542	0	377.431		77.027	175.761	0	84.2628
AT5G04590	457.126	319.34	342.292	372.92		462.162	511.306	446.065	473.178
AT1G78510	46.0001	327.743	1003.43	459.059		23.7006	74.5655	186.184	94.8166
AT1G19000	454.251	298.331	365.737	372.773		379.21	189.077	279.275	282.521
AT2G39460	422.626	512.624	178.18	371.143		254.782	245.001	116.365	205.382
AT1G51402	876.878	4.20184	0	293.693		959.875	5.3261	0	321.734
AT3G15360	393.876	0	792.43	395.435		165.904	0	407.277	191.06
AT4G39090	345.001	403.377	417.315	388.564		328.846	466.034	368.488	387.79
AT2G16600	540.502	487.413	0	342.638		1395.37	735.002	0	710.125
AT1G48920	138	331.945	829.942	433.296		121.466	138.479	368.488	209.478
AT4G35830	149.5	302.532	844.008	432.014		201.455	287.61	1109.34	532.803
AT2G43030	258.751	243.707	726.785	409.748		82.9521	106.522	364.61	184.695
AT5G42650	382.376	260.514	506.405	383.098		94.8025	47.9349	131.88	91.5392
AT5G04830	454.251	243.707	403.248	367.069		183.68	133.153	256.002	190.945
AT1G78040	379.501	613.469	107.846	366.938		1487.21	2077.18	686.552	1416.98
AT1G65960	189.751	521.028	520.472	410.417		408.836	1238.32	1400.26	1015.8
AT1G76080	445.626	298.331	346.981	363.646		145.166	93.2068	182.305	140.226
AT2G18440	347.876	470.606	304.781	374.421		305.145	479.349	201.699	328.731
AT1G26880	517.502	310.936	196.935	341.791		272.557	191.74	287.033	250.443
AT4G17090	267.376	365.56	534.539	389.158		53.3264	90.5438	116.365	86.745
AT5G58140	304.751	714.313	84.4008	367.822		71.1018	234.349	73.6977	126.383
AT1G69840	586.502	0	422.004	336.169		497.713	0	581.824	359.846
AT3G50820	31.6251	1109.29	84.4008	408.437		26.6632	545.926	19.3941	197.328
AT5G02960	2.87501	844.57	426.693	424.713		5.92515	434.077	193.941	211.315
AT1G76100	347.876	361.358	393.871	367.702		192.567	279.62	395.64	289.276
AT3G05590	635.377	138.661	173.491	315.843		237.006	77.2285	174.547	162.927
AT1G11910	474.376	525.23	4.68894	334.765		382.172	572.556	0	318.243
AT5G11740	17.2501	231.101	1073.77	440.706		97.765	1019.95	4165.86	1761.19
AT1G32470	293.251	142.863	722.096	386.07		180.717	197.066	523.641	300.475
AT3G54050	618.127	268.918	51.5783	312.874		260.707	130.49	15.5153	135.571
AT2G42210	494.502	302.532	206.313	334.449		722.869	564.567	387.883	558.439
AT5G25610	284.626	302.532	548.606	378.588		699.168	945.383	1532.14	1058.9
AT3G18740	385.251	428.588	239.136	350.992		290.333	303.588	224.972	272.964
AT1G09690	560.627	369.762	18.7557	316.381		210.343	157.12	23.273	130.245
AT1G10960	362.251	672.294	0	344.848		133.316	319.566	0	150.961
AT3G61060	310.501	361.358	431.382	367.747		148.129	186.414	224.972	186.505
AT4G00810	649.752	252.11	0	300.621		337.734	143.805	0	160.513
AT2G32060	819.378	0	0	273.126		186.642	0	0	62.2141
AT5G55620	232.876	323.542	590.806	382.408		41.4761	69.2394	178.426	96.3805
AT3G10230	258.751	436.991	422.004	372.582		148.129	207.718	256.002	203.95
AT1G52510	287.501	168.074	675.207	376.927		213.306	77.2285	426.671	239.068
AT1G75280	322.001	197.486	586.117	368.535		2224.9	1805.55	3983.55	2671.33
AT1G56045	376.626	67.2294	637.695	360.517		245.894	15.9783	364.61	208.827
AT2G20260	575.002	4.20184	384.493	321.232		595.478	7.98916	562.43	388.632
AT4G21860	425.501	512.624	56.2672	331.464		228.118	229.022	0	152.38
AT5G09510	0	747.927	487.649	411.859		0	330.218	333.579	221.266
AT3G25585	483.002	369.762	112.534	321.766		319.958	234.349	0	184.769
AT1G03600	488.752	390.771	75.023	318.182		266.632	207.718	34.9094	169.753
AT5G25280	322.001	214.294	543.917	360.07		106.653	93.2068	100.849	100.236
AT3G19710	382.376	306.734	337.603	342.238		1567.2	1781.58	1214.07	1520.95
AT5G28060	442.751	512.624	0	318.459		331.809	287.61	0	206.473
AT5G04750	304.751	436.991	309.47	350.404		337.734	580.545	279.275	399.185
AT5G14030	345.001	319.34	375.115	346.485		376.247	330.218	496.49	400.985
AT5G64170	454.251	151.266	384.493	330.003		136.279	165.109	93.0918	131.493
AT1G18080	307.626	256.312	501.716	355.218		165.904	154.457	197.82	172.727
AT3G09630	34.5001	558.845	609.562	400.969		65.1767	245.001	287.033	199.07
AT5G43850	324.876	193.285	539.228	352.463		85.9147	79.8916	190.062	118.623
AT5G38980	764.752	0	23.4447	262.732		648.804	0	23.273	224.026
AT5G01410	531.877	142.863	243.825	306.188		177.755	23.9675	96.9706	99.5642
AT1G23740	319.126	264.716	454.827	346.223		94.8025	119.837	112.486	109.042
AT3G05165	345.001	50.4221	647.073	347.499		177.755	23.9675	267.639	156.454
AT2G29650	276.001	579.854	168.802	341.552		195.53	247.664	93.0918	178.762
AT3G55440	293.251	449.597	276.647	339.832		219.231	535.273	368.488	374.331
AT2G37340	319.126	239.505	464.205	340.945		337.734	247.664	314.185	299.861
AT5G19500	497.377	0	440.76	312.712		373.285	5.3261	337.458	238.69
AT1G68590	414.001	285.725	253.203	317.643		148.129	191.74	162.911	167.593
AT4G21960	253.001	348.753	445.449	349.067		2266.37	3749.58	3665.49	3227.15
AT1G21065	2.87501	336.147	867.453	402.158		2.96258	103.859	333.579	146.8
AT2G41090	77.6252	672.294	361.048	370.323		26.6632	418.099	329.7	258.154
AT3G01910	396.751	403.377	140.668	313.599		399.948	263.642	244.366	302.652
AT1G57720	471.501	352.955	75.023	299.826		408.836	260.979	15.5153	228.443
AT1G78380	247.251	256.312	543.917	349.16		414.761	260.979	492.611	389.45
AT5G62300	350.751	588.258	0	313.003		290.333	383.479	0	224.604
AT1G15950	408.251	462.202	46.8894	305.781		1350.93	1081.2	178.426	870.187
AT1G17220	270.251	310.936	440.76	340.649		136.279	101.196	170.668	136.048
AT3G01280	235.751	105.046	722.096	354.298		106.653	71.9024	422.792	200.449
AT3G01540	264.501	352.955	398.56	338.672		367.36	340.871	562.43	423.553
AT3G15190	307.626	142.863	557.983	336.157		142.204	37.2827	221.093	133.526
AT5G58070	255.876	294.129	473.583	341.196		334.771	324.892	395.64	351.768
AT4G38810	575.002	159.67	103.157	279.276		367.36	79.8916	23.273	156.841
AT3G15850	339.251	373.964	248.514	320.576		85.9147	47.9349	31.0306	54.9601
AT4G19200	77.6252	126.055	951.854	385.178		56.289	47.9349	496.49	200.238
AT1G69620	175.376	563.047	300.092	346.171		174.792	378.153	232.73	261.892
AT1G15810	698.627	58.8258	9.37787	255.61		453.274	45.2719	15.5153	171.354
AT5G35170	247.251	361.358	403.248	337.286		109.615	149.131	209.457	156.068
AT5G20160	143.75	361.358	572.05	359.053		106.653	95.8699	232.73	145.084
AT1G07280	370.876	403.377	154.735	309.663		88.8773	47.9349	42.6671	59.8264
AT1G31812	393.876	504.221	0	299.366		669.542	660.437	0	443.326
AT5G06530	362.251	247.909	337.603	315.921		213.306	237.012	256.002	235.44
AT3G60770	333.501	310.936	314.159	319.532		168.867	146.468	108.607	141.314
AT2G20570	327.751	235.303	407.937	323.664		133.316	106.522	135.759	125.199
AT5G38470	362.251	336.147	234.447	310.948		539.189	308.914	263.76	370.621
AT1G79550	396.751	159.67	375.115	310.512		468.087	383.479	504.247	451.938
AT2G43710	247.251	210.092	562.672	340.005		124.428	127.826	209.457	153.904
AT3G62290	296.126	294.129	384.493	324.916		631.029	545.926	892.13	689.695
AT2G39470	8.62503	516.826	604.873	376.775		0	183.751	349.094	177.615
AT4G16830	388.126	239.505	295.403	307.678		604.366	407.447	325.821	445.878
AT5G50950	483.002	0	407.937	296.98		106.653	0	197.82	101.491
AT1G25275	414.001	453.799	14.0668	293.956		293.295	375.49	58.1824	242.323
AT3G04920	264.501	294.129	431.382	330.004		106.653	146.468	131.88	128.334
AT1G62740	690.002	58.8258	0	249.609		159.979	58.5871	3.87883	74.1484
AT3G07110	241.501	495.817	234.447	323.922		159.979	186.414	155.153	167.182
AT2G32700	258.751	352.955	365.737	325.814		319.958	367.501	349.094	345.518
AT4G00780	218.501	268.918	520.472	335.963		100.728	162.446	205.578	156.251
AT3G02730	431.251	21.0092	450.138	300.799		272.557	0	259.881	177.479
AT1G58290	391.001	252.11	257.891	300.334		207.38	157.12	139.638	168.046
AT1G07940	5.75002	1042.06	0	349.269		23.7006	703.046	7.75765	244.835
AT1G48030	316.251	420.184	187.557	307.997		154.054	250.327	131.88	178.754
AT1G32400	232.876	289.927	464.205	329.002		408.836	559.241	453.823	473.966
AT3G52560	258.751	390.771	309.47	319.664		604.366	695.057	674.916	658.113
AT5G13180	304.751	231.101	412.626	316.159		32.5883	87.8807	116.365	78.9446
AT2G36530	488.752	331.945	0	273.566		361.434	250.327	7.75765	206.506
AT2G14910	299.001	386.569	243.825	309.798		213.306	234.349	186.184	211.279
AT1G04410	140.875	621.872	239.136	333.961		248.856	705.709	271.518	408.694
AT5G42300	330.626	281.523	300.092	304.08		429.574	423.425	345.215	399.405
AT2G21970	143.75	340.349	539.228	341.109		50.3638	138.479	271.518	153.453
AT4G24280	419.751	37.8166	417.315	291.628		139.241	5.3261	112.486	85.6844
AT1G71030	273.126	197.486	473.583	314.732		59.2515	23.9675	81.4553	54.8914
AT3G22840	457.126	193.285	168.802	273.071		38.5135	47.9349	38.7883	41.7456
AT4G04020	0	310.936	778.363	363.1		0	130.49	449.944	193.478
AT3G52150	63.2502	546.239	412.626	340.705		47.4012	122.5	85.3342	85.0786
AT3G62840	333.501	159.67	403.248	298.806		474.012	207.718	341.337	341.022
AT3G52300	396.751	428.588	0	275.113		314.033	447.393	0	253.809
AT1G63770	215.626	693.304	0	302.976		284.407	471.36	0	251.923
AT4G34050	422.626	176.477	234.447	277.85		6096.98	2612.45	2466.93	3725.46
AT1G68530	299.001	403.377	178.18	293.519		545.114	569.893	271.518	462.175
AT5G27850	241.501	201.688	492.338	311.842		162.942	159.783	221.093	181.273
AT3G56800	557.752	16.8074	182.869	252.476		758.42	31.9566	190.062	326.813
AT4G32590	540.502	201.688	0	247.397		248.856	159.783	0	136.213
AT2G38040	281.751	218.496	403.248	301.165		189.605	159.783	395.64	248.343
AT1G65720	319.126	298.331	248.514	288.657		391.06	359.512	228.851	326.474
AT2G29450	368.001	449.597	0	272.533		180.717	186.414	0	122.377
AT5G66180	664.127	12.6055	0	225.578		533.264	15.9783	3.87883	184.374
AT5G38480	345.001	235.303	271.958	284.087		503.638	319.566	512.005	445.07
AT3G02380	258.751	163.872	487.649	303.424		68.1393	42.6088	104.728	71.8255
AT3G52230	241.501	189.083	482.96	304.515		124.428	90.5438	201.699	138.89
AT2G01350	345.001	168.074	337.603	283.559		154.054	106.522	263.76	174.779
AT1G20450	178.251	268.918	497.027	314.732		533.264	532.61	954.191	673.355
AT5G54280	598.002	67.2294	37.5115	234.248		485.863	90.5438	46.5459	207.651
AT3G61870	563.502	147.064	0	236.855		396.985	154.457	0	183.814
AT5G65480	330.626	273.12	239.136	280.96		420.686	426.088	372.367	406.38
AT5G35480	0	966.423	0	322.141		5.92515	197.066	0	67.6637
AT3G13080	11.5	403.377	609.562	341.479		5.92515	122.5	147.395	91.9403
AT2G20820	316.251	504.221	0	273.491		426.611	532.61	0	319.74
AT5G47190	350.751	105.046	384.493	280.097		100.728	45.2719	89.213	78.4042
AT4G32850	46.0001	348.753	609.562	334.772		112.578	601.85	1198.56	637.662
AT1G07010	327.751	0	534.539	287.43		130.353	0	186.184	105.512
AT5G09900	276.001	289.927	295.403	287.11		177.755	311.577	209.457	232.929
AT5G20250	207.001	277.321	422.004	302.109		0	87.8807	93.0918	60.3242
AT4G29160	301.876	289.927	253.203	281.668		346.621	287.61	302.548	312.26
AT1G73390	172.501	151.266	618.94	314.235		47.4012	106.522	186.184	113.369
AT4G34670	350.751	411.78	32.8226	265.118		136.279	226.359	31.0306	131.223
AT3G56340	166.751	193.285	572.05	310.695		103.69	149.131	151.274	134.698
AT5G46250	345.001	0	492.338	279.113		613.253	15.9783	744.734	457.989
AT5G08670	313.376	369.762	131.29	271.476		242.931	396.795	224.972	288.233
AT5G59540	316.251	168.074	346.981	277.102		41.4761	5.3261	85.3342	44.0454
AT2G43160	322.001	285.725	206.313	271.346		355.509	479.349	356.852	397.237
AT2G47610	172.501	50.4221	712.718	311.88		68.1393	53.261	275.397	132.266
AT2G31380	261.626	369.762	206.313	279.234		100.728	111.848	42.6671	85.081
AT1G53240	350.751	197.486	248.514	265.584		231.081	250.327	186.184	222.53
AT1G55490	103.5	722.716	65.6451	297.287		11.8503	175.761	31.0306	72.8808
AT3G60600	155.25	201.688	562.672	306.537		266.632	255.653	1477.83	666.706
AT3G48140	310.501	474.808	0	261.77		453.274	631.143	0	361.473
AT3G28270	31.6251	352.955	590.806	325.129		11.8503	223.696	356.852	197.466
AT1G02560	577.877	63.0276	23.4447	221.45		281.445	53.261	11.6365	115.447
AT1G15980	186.876	243.707	459.516	296.699		62.2141	122.5	159.032	114.582
AT3G53870	2.87501	281.523	712.718	332.372		0	125.163	356.852	160.672
AT3G14067	299.001	4.20184	534.539	279.247		237.006	106.522	356.852	233.46
AT3G48690	169.626	193.285	529.85	297.587		82.9521	69.2394	155.153	102.448
AT2G23930	322.001	159.67	318.848	266.84		171.829	154.457	217.214	181.167
AT4G04340	232.876	235.303	379.804	282.661		257.744	279.62	256.002	264.456
AT5G28840	255.876	331.945	234.447	274.089		127.391	127.826	65.94	107.052
AT1G05190	299.001	386.569	103.157	262.909		177.755	186.414	147.395	170.521
AT3G47650	362.251	382.367	0	248.206		127.391	111.848	0	79.7463
AT4G19420	224.251	172.275	459.516	285.347		248.856	295.599	488.732	344.396
AT5G53420	299.001	12.6055	515.783	275.796		71.1018	0	139.638	70.2465
AT4G02380	402.501	323.542	0	242.014		337.734	226.359	0	188.031
AT3G13750	330.626	25.211	445.449	267.095		192.567	21.3044	190.062	134.645
AT5G49940	241.501	294.129	290.714	275.448		154.054	213.044	411.156	259.418
AT3G04870	379.501	184.881	187.557	250.647		100.728	47.9349	54.3036	67.6554
AT2G47170	209.876	315.138	318.848	281.287		367.36	615.165	372.367	451.631
AT2G39780	322.001	168.074	300.092	263.389		136.279	90.5438	209.457	145.426
AT2G35260	307.626	214.294	267.269	263.063		222.193	146.468	120.244	162.968
AT2G30860	485.877	193.285	0	226.387		2177.49	596.524	0	924.673
AT1G78900	396.751	319.34	0	238.697		859.147	697.72	0	518.956
AT3G10970	276.001	365.56	140.668	260.743		133.316	127.826	11.6365	90.9263
AT5G57040	238.626	336.147	234.447	269.74		192.567	151.794	100.849	148.404
AT3G01480	195.501	176.477	478.271	283.416		65.1767	122.5	294.791	160.823
AT4G27040	471.501	201.688	0	224.397		343.659	191.74	0	178.466
AT5G14260	368.001	247.909	117.223	244.378		71.1018	82.5546	23.273	58.9765
AT4G03520	112.125	512.624	234.447	286.399		88.8773	279.62	104.728	157.742
AT5G28020	549.127	84.0368	0	211.055		106.653	0	0	35.5509
AT1G65490	592.252	21.0092	0	204.42		219.231	2.66305	0	73.9646
AT4G30530	0	306.734	647.073	317.936		2.96258	439.404	915.403	452.59
AT1G75180	155.25	100.844	623.628	293.241		71.1018	39.9458	162.911	91.3194
AT1G09310	586.502	25.211	0	203.904		2621.88	71.9024	0	897.928
AT2G44120	356.501	361.358	0	239.286		148.129	159.783	0	102.637
AT5G57290	8.62503	869.781	0	292.802		0	495.328	0	165.109
AT1G16410	232.876	168.074	417.315	272.755		639.917	500.654	884.372	674.981
AT2G45660	204.126	138.661	497.027	279.938		133.316	66.5763	337.458	179.117
AT4G36530	255.876	210.092	328.226	264.731		71.1018	101.196	116.365	96.2209
AT2G18050	339.251	193.285	206.313	246.283		71.1018	37.2827	31.0306	46.4717
AT3G52800	293.251	319.34	140.668	251.086		394.023	455.382	166.789	338.731
AT4G16520	276.001	168.074	337.603	260.559		420.686	189.077	302.548	304.104
AT1G07920	2.87501	861.377	9.37787	291.21		0	426.088	7.75765	144.615
AT3G05840	241.501	310.936	234.447	262.295		165.904	117.174	147.395	143.491
AT1G76200	276.001	239.505	257.891	257.799		396.985	340.871	236.608	324.821
AT5G10380	161.001	138.661	553.294	284.319		121.466	181.088	566.309	289.621
AT1G10590	129.375	214.294	520.472	288.047		328.846	199.729	546.914	358.496
AT5G13450	261.626	319.34	187.557	256.174		334.771	458.045	217.214	336.677
AT3G18780	34.5001	815.157	0	283.219		88.8773	1145.11	0	411.33
AT4G10480	207.001	285.725	309.47	267.399		136.279	117.174	77.5765	110.343
AT3G53020	0	205.89	736.163	314.018		8.88773	130.49	457.701	199.026
AT3G19700	382.376	302.532	0	228.303		1558.32	1781.58	0	1113.3
AT3G54210	209.876	256.312	332.914	266.367		136.279	103.859	124.122	121.42
AT5G14200	586.502	4.20184	0	196.901		4177.23	165.109	0	1447.45
AT1G79600	319.126	151.266	271.958	247.45		124.428	42.6088	77.5765	81.5379
AT5G24120	227.126	197.486	370.426	265.013		38.5135	55.9241	81.4553	58.631
AT4G18480	169.626	319.34	323.537	270.834		106.653	127.826	159.032	131.17
AT1G74970	359.376	168.074	182.869	236.773		130.353	69.2394	116.365	105.319
AT4G23100	253.001	479.01	9.37787	247.129		515.488	990.655	15.5153	507.22
AT2G23600	172.501	105.046	557.983	278.51		100.728	34.6197	228.851	121.399
AT2G46280	250.126	163.872	365.737	259.912		106.653	175.761	128.001	136.805
AT2G34460	204.126	163.872	436.071	268.023		82.9521	61.2502	162.911	102.371
AT2G23120	258.751	466.404	4.68894	243.281		367.36	641.796	7.75765	338.971
AT5G21020	172.501	436.991	178.18	262.557		177.755	444.73	166.789	263.091
AT5G38520	247.251	159.67	365.737	257.553		94.8025	90.5438	139.638	108.328
AT4G17040	224.251	218.496	337.603	260.117		133.316	170.435	174.547	159.433
AT4G15560	169.626	390.771	234.447	264.948		145.166	356.849	236.608	246.208
AT2G42130	218.501	159.67	412.626	263.599		94.8025	85.2177	248.245	142.755
AT4G16410	276.001	16.8074	473.583	255.464		118.503	10.6522	217.214	115.457
AT1G75460	293.251	231.101	206.313	243.555		71.1018	61.2502	77.5765	69.9762
AT1G48760	543.377	12.6055	42.2004	199.394		53.3264	71.9024	34.9094	53.3794
AT4G00100	17.2501	815.157	4.68894	279.032		20.738	284.947	0	101.895
AT1G16720	508.877	0	107.846	205.574		162.942	0	58.1824	73.708
AT5G56600	155.25	294.129	356.359	268.579		159.979	165.109	193.941	173.01
AT1G06430	224.251	0	567.361	263.871		88.8773	0	178.426	89.1011
AT1G64770	402.501	247.909	0	216.803		56.289	53.261	0	36.5167
AT4G04770	322.001	247.909	126.601	232.17		174.792	125.163	77.5765	125.844
AT3G23400	393.876	256.312	0	216.729		293.295	199.729	3.87883	165.634
AT5G22650	0	613.469	243.825	285.764		0	170.435	116.365	95.6
AT1G14400	310.501	8.40368	412.626	243.844		474.012	23.9675	589.581	362.52
AT2G46430	166.751	134.459	506.405	269.205		53.3264	53.261	162.911	89.8327
AT3G06510	163.876	268.918	356.359	263.051		79.9896	213.044	263.76	185.598
AT3G52380	192.626	226.899	351.67	257.065		47.4012	34.6197	65.94	49.3203
AT4G14210	310.501	176.477	215.691	234.223		118.503	133.153	116.365	122.673
AT5G44290	276.001	319.34	112.534	235.958		308.108	85.2177	201.699	198.342
AT2G05380	552.002	8.40368	9.37787	189.928		5.92515	0	0	1.97505
AT4G36648	304.751	189.083	206.313	233.382		462.162	327.555	399.519	396.412
AT4G27090	0	819.359	0	273.12		0	548.589	0	182.863
AT3G06125	235.751	428.588	51.5783	238.639		438.461	388.806	31.0306	286.099
AT1G48600	402.501	4.20184	253.203	219.969		192.567	0	116.365	102.977
AT5G63310	221.376	159.67	370.426	250.491		59.2515	53.261	120.244	77.5854
AT2G37970	207.001	210.092	337.603	251.565		32.5883	42.6088	131.88	69.0257
AT5G54130	221.376	491.615	0	237.664		8.88773	39.9458	0	16.2778
AT3G46010	218.501	302.532	215.691	245.575		408.836	601.85	294.791	435.159
AT1G20696	143.75	605.065	0	249.605		68.1393	431.414	11.6365	170.397
AT2G17695	402.501	117.652	121.912	214.022		165.904	74.5655	62.0612	100.844
AT1G61150	0	142.863	750.23	297.697		0	127.826	535.278	221.035
AT2G24420	304.751	0	412.626	239.126		308.108	0	442.186	250.098
AT3G27690	11.5	794.148	0	268.549		8.88773	1446.04	7.75765	487.561
AT5G07020	120.75	109.248	586.117	272.038		56.289	69.2394	178.426	101.318
AT1G04400	264.501	193.285	253.203	236.996		213.306	165.109	318.064	232.159
AT1G76520	132.25	193.285	468.894	264.81		94.8025	245.001	201.699	180.501
AT1G06650	235.751	285.725	196.935	239.47		124.428	90.5438	77.5765	97.5162
AT5G20920	163.876	390.771	196.935	250.527		142.204	247.664	232.73	207.532
AT1G14570	276.001	184.881	243.825	234.902		154.054	191.74	574.066	306.62
AT5G14060	172.501	210.092	384.493	255.695		183.68	143.805	155.153	160.879
AT5G20090	189.751	529.432	0	239.727		213.306	471.36	0	228.222
AT5G12860	281.751	226.899	187.557	232.069		130.353	85.2177	131.88	115.817
AT4G09320	14.375	785.744	0	266.706		11.8503	540.6	0	184.15
AT4G13850	483.002	100.844	0	194.615		556.964	202.392	0	253.119
AT3G08740	175.376	168.074	422.004	255.151		38.5135	55.9241	89.213	61.2169
AT5G65720	201.251	235.303	300.092	245.549		171.829	202.392	232.73	202.317
AT5G20720	0	453.799	384.493	279.43		0	106.522	93.0918	66.538
AT5G35530	189.751	105.046	459.516	251.437		118.503	109.185	279.275	168.988
AT5G45430	379.501	8.40368	257.891	215.265		239.969	7.98916	131.88	126.613
AT5G45428	379.501	8.40368	257.891	215.265		239.969	7.98916	131.88	126.613
AT5G16030	250.126	315.138	126.601	230.622		88.8773	47.9349	23.273	53.3617
AT4G30960	235.751	243.707	225.069	234.842		186.642	295.599	213.335	231.859
AT4G25650	207.001	235.303	281.336	241.213		165.904	154.457	170.668	163.677
AT3G07700	494.502	0	75.023	189.842		159.979	0	54.3036	71.4276
AT1G52870	28.7501	58.8258	768.986	285.52		35.5509	50.598	271.518	119.222
AT3G25690	253.001	226.899	215.691	231.864		47.4012	55.9241	38.7883	47.3712
AT2G22430	74.7502	176.477	557.983	269.737		29.6258	146.468	290.912	155.669
AT1G70600	178.251	521.028	0	233.093		106.653	338.208	0	148.287
AT3G12345	276.001	252.11	140.668	222.926		82.9521	103.859	77.5765	88.1292
AT3G49680	276.001	50.4221	365.737	230.72		242.931	85.2177	558.551	295.567
AT2G41100	310.501	239.505	98.4677	216.158		399.948	399.458	244.366	347.924
AT1G63970	373.751	151.266	93.7787	206.265		100.728	85.2177	15.5153	67.1535
AT1G16080	241.501	247.909	201.624	230.345		118.503	103.859	96.9706	106.444
AT5G54390	100.625	155.468	534.539	263.544		82.9521	149.131	364.61	198.898
AT4G29070	212.751	126.055	384.493	241.1		171.829	37.2827	193.941	134.351
AT5G23740	342.126	281.523	0	207.883		157.017	194.403	0	117.14
AT1G72610	301.876	184.881	168.802	218.52		74.0644	63.9132	50.4247	62.8008
AT5G42050	161.001	231.101	346.981	246.361		331.809	519.295	733.098	528.067
AT3G62030	388.126	210.092	0	199.406		183.68	95.8699	0	93.1832
AT1G60960	181.126	105.046	454.827	246.999		162.942	63.9132	399.519	208.791
AT4G38840	247.251	243.707	187.557	226.172		23.7006	23.9675	19.3941	22.3541
AT3G44100	169.626	113.45	459.516	247.53		109.615	101.196	287.033	165.948
AT2G44920	212.751	218.496	271.958	234.402		88.8773	58.5871	108.607	85.3572
AT1G50440	388.126	155.468	56.2672	199.954		239.969	130.49	162.911	177.79
AT1G20440	264.501	327.743	65.6451	219.296		554.002	681.741	147.395	461.046
AT2G26080	2.87501	508.423	286.025	265.774		11.8503	266.305	182.305	153.487
AT5G40950	299.001	331.945	0	210.315		97.765	143.805	0	80.5233
AT4G27960	368.001	226.899	0	198.3		343.659	383.479	0	242.379
AT3G55770	14.375	113.45	703.34	277.055		88.8773	418.099	1706.68	737.887
AT1G32700	201.251	159.67	346.981	235.967		189.605	79.8916	333.579	201.025
AT3G10920	184.001	470.606	28.1336	227.58		331.809	362.175	31.0306	241.671
AT5G11770	287.501	92.4405	276.647	218.863		322.921	101.196	302.548	242.222
AT4G01310	296.126	189.083	154.735	213.315		71.1018	74.5655	65.94	70.5358
AT5G12470	195.501	75.6331	445.449	238.861		74.0644	79.8916	221.093	125.016
AT1G57660	316.251	294.129	0	203.46		139.241	202.392	0	113.878
AT1G20693	293.251	327.743	0	206.998		453.274	287.61	0	246.961
AT4G27700	235.751	84.0368	365.737	228.508		106.653	74.5655	182.305	121.174
AT3G03780	353.626	126.055	126.601	202.094		4186.12	1693.7	1280.01	2386.61
AT4G34190	120.75	407.578	192.246	240.192		50.3638	165.109	85.3342	100.269
AT2G33340	267.376	201.688	182.869	217.311		204.418	143.805	139.638	162.62
AT2G14750	281.751	176.477	187.557	215.262		548.077	404.784	597.339	516.733
AT4G23600	293.251	214.294	126.601	211.382		8.88773	21.3044	0	10.064
AT1G73650	425.501	0	150.046	191.849		165.904	10.6522	46.5459	74.3675
AT4G34870	149.5	336.147	220.38	235.343		59.2515	394.132	221.093	224.825
AT4G13510	181.126	109.248	422.004	237.459		263.669	66.5763	411.156	247.134
AT2G18960	454.251	63.0276	28.1336	181.804		251.819	106.522	23.273	127.205
AT1G75950	319.126	281.523	0	200.216		331.809	332.882	0	221.563
AT3G27850	0	735.322	14.0668	249.796		0	290.273	0	96.7576
AT4G09040	218.501	176.477	281.336	225.438		53.3264	85.2177	124.122	87.5555
AT1G74270	184.001	37.8166	492.338	238.052		91.8399	45.2719	182.305	106.472
AT4G32060	94.8753	285.725	356.359	245.653		136.279	436.741	403.398	325.472
AT1G78870	232.876	176.477	253.203	220.852		222.193	199.729	290.912	237.611
AT1G34000	287.501	21.0092	337.603	215.371		59.2515	23.9675	151.274	78.1644
AT4G28080	212.751	117.652	351.67	227.357		71.1018	53.261	116.365	80.2425
AT3G48000	353.626	193.285	32.8226	193.244		228.118	154.457	34.9094	139.162
AT5G20190	258.751	155.468	229.758	214.659		142.204	117.174	279.275	179.551
AT2G47470	11.5	588.258	150.046	249.935		82.9521	1203.7	418.913	568.522
AT2G32480	316.251	100.844	196.935	204.677		189.605	85.2177	85.3342	120.052
AT1G65260	301.876	189.083	121.912	204.29		106.653	117.174	69.8189	97.882
AT1G70760	287.501	298.331	23.4447	203.092		139.241	85.2177	0	74.8196
AT5G13800	258.751	151.266	234.447	214.821		112.578	63.9132	100.849	92.4469
AT4G14400	267.376	147.064	225.069	213.17		115.54	39.9458	34.9094	63.4652
AT2G24200	224.251	142.863	300.092	222.402		450.312	79.8916	543.036	357.746
AT1G44770	143.75	226.899	337.603	236.084		225.156	303.588	201.699	243.481
AT5G64350	244.376	378.166	0	207.514		456.237	444.73	0	300.322
AT3G56910	293.251	0	342.292	211.848		151.091	0	139.638	96.9097
AT2G33450	100.625	382.367	229.758	237.584		26.6632	122.5	151.274	100.146
AT5G07090	322.001	243.707	18.7557	194.821		201.455	213.044	0	138.166
AT5G46430	0	0	815.875	271.958		0	0	457.701	152.567
AT5G19350	149.5	159.67	393.871	234.347		77.027	79.8916	147.395	101.438
AT1G75410	138	184.881	384.493	235.791		59.2515	63.9132	131.88	85.0149
AT1G22850	273.126	105.046	253.203	210.458		106.653	23.9675	77.5765	69.3989
AT3G08590	207.001	319.34	121.912	216.084		82.9521	165.109	139.638	129.233
AT1G04350	140.875	100.844	473.583	238.434		65.1767	47.9349	170.668	94.5933
AT4G02570	181.126	264.716	225.069	223.637		133.316	359.512	477.096	323.308
AT1G67700	345.001	218.496	9.37787	190.958		165.904	181.088	0	115.664
AT1G74730	264.501	155.468	206.313	208.761		201.455	159.783	166.789	176.009
AT1G65980	123.625	546.239	0	223.288		325.883	628.48	0	318.121
AT1G18540	287.501	302.532	4.68894	198.241		106.653	95.8699	0	67.5075
AT5G57180	238.626	155.468	248.514	214.202		47.4012	18.6414	50.4247	38.8224
AT5G49910	350.751	214.294	0	188.348		62.2141	79.8916	0	47.3686
AT3G16520	253.001	142.863	239.136	211.666		71.1018	29.2936	128.001	76.1322
AT2G15555	25.8751	306.734	422.004	251.538		35.5509	585.871	659.4	426.941
AT1G69252	310.501	151.266	131.29	197.686		168.867	109.185	93.0918	123.715
AT5G28750	336.376	231.101	0	189.159		82.9521	133.153	0	72.0349
AT1G32220	322.001	168.074	93.7787	194.618		112.578	50.598	34.9094	66.0284
AT1G63940	218.501	184.881	243.825	215.735		118.503	149.131	108.607	125.414
AT1G27290	218.501	218.496	206.313	214.437		207.38	117.174	178.426	167.66
AT3G09500	25.8751	79.835	675.207	260.306		23.7006	69.2394	333.579	142.173
AT1G22140	247.251	306.734	60.9562	204.98		239.969	245.001	58.1824	181.051
AT3G59540	123.625	537.835	4.68894	222.05		38.5135	250.327	0	96.2801
AT1G79920	40.2501	8.40368	731.474	260.043		82.9521	0	349.094	144.015
AT1G08360	324.876	247.909	0	190.928		207.38	170.435	0	125.939
AT4G18730	261.626	142.863	215.691	206.726		124.428	103.859	135.759	121.349
AT2G20610	273.126	176.477	159.424	203.009		471.05	681.741	496.49	549.76
AT5G09810	25.8751	214.294	520.472	253.547		287.37	727.013	1082.19	698.858
AT4G17340	195.501	428.588	4.68894	209.592		74.0644	298.262	0	124.109
AT3G48560	276.001	29.4129	314.159	206.524		130.353	7.98916	190.062	109.468
AT4G26710	212.751	159.67	271.958	214.793		331.809	218.37	457.701	335.96
AT5G06320	232.876	100.844	300.092	211.271		832.484	295.599	643.885	590.656
AT2G40510	276.001	306.734	0	194.245		222.193	199.729	0	140.641
AT5G59030	184.001	197.486	271.958	217.815		71.1018	111.848	159.032	113.994
AT4G08920	270.251	12.6055	337.603	206.82		127.391	2.66305	155.153	95.069
AT2G35410	218.501	130.257	290.714	213.157		53.3264	47.9349	50.4247	50.562
AT1G33110	293.251	4.20184	309.47	202.308		17.7755	0	93.0918	36.9558
AT5G56870	161.001	134.459	375.115	223.525		82.9521	29.2936	128.001	80.0823
AT5G63300	189.751	130.257	332.914	217.641		53.3264	42.6088	112.486	69.4737
AT4G38510	149.5	151.266	375.115	225.294		509.563	362.175	651.643	507.794
AT1G72510	0	277.321	478.271	251.864		0	85.2177	209.457	98.2247
AT3G49580	207.001	205.89	215.691	209.527		5.92515	2.66305	0	2.86274
AT4G09800	201.251	21.0092	431.382	217.881		157.017	7.98916	345.215	170.074
AT3G03100	149.5	479.01	0	209.503		165.904	426.088	0	197.331
AT3G47420	327.751	25.211	215.691	189.551		32.5883	0	11.6365	14.7416
AT5G65220	71.8752	319.34	304.781	231.999		32.5883	127.826	193.941	118.119
AT1G53670	270.251	0	337.603	202.618		29.6258	0	139.638	56.4212
AT5G17230	235.751	210.092	159.424	201.756		195.53	149.131	131.88	158.847
AT3G52720	224.251	113.45	286.025	207.908		100.728	39.9458	147.395	96.0229
AT5G02840	296.126	0	295.403	197.176		183.68	0	197.82	127.167
AT5G22440	253.001	277.321	56.2672	195.53		47.4012	69.2394	23.273	46.6378
AT1G02500	212.751	268.918	131.29	204.32		41.4761	4511.21	1419.65	1990.78
AT5G08290	158.125	130.257	370.426	219.603		222.193	210.381	473.217	301.93
AT1G48300	244.376	151.266	206.313	200.652		168.867	138.479	279.275	195.54
AT1G19350	186.876	294.129	140.668	207.224		14.8129	519.295	678.794	404.301
AT3G47370	215.626	378.166	0	197.93		266.632	247.664	0	171.432
AT3G14230	250.126	252.11	84.4008	195.546		311.071	383.479	162.911	285.82
AT4G34110	296.126	226.899	37.5115	186.846		284.407	175.761	42.6671	167.612
AT3G17390	158.125	323.542	150.046	210.571		453.274	705.709	422.792	527.258
AT3G16770	115	512.624	9.37787	212.334		82.9521	151.794	0	78.2487
AT1G29070	304.751	184.881	65.6451	185.092		103.69	109.185	34.9094	82.5949
AT1G16180	261.626	197.486	121.912	193.675		198.493	276.957	248.245	241.232
AT1G29120	276.001	201.688	93.7787	190.489		82.9521	106.522	31.0306	73.5016
AT4G00355	356.501	67.2294	112.534	178.755		524.376	202.392	201.699	309.489
AT4G22570	276.001	8.40368	309.47	197.958		275.52	2.66305	283.154	187.112
AT5G59880	207.001	193.285	215.691	205.325		319.958	351.523	403.398	358.293
AT3G56050	143.75	302.532	196.935	214.406		142.204	292.936	209.457	214.865
AT3G21670	342.126	155.468	37.5115	178.369		29.6258	15.9783	7.75765	17.7872
AT1G45474	333.501	8.40368	215.691	185.865		189.605	0	155.153	114.919
AT4G19840	166.751	226.899	239.136	210.929		124.428	213.044	116.365	151.279
AT1G50910	138	159.67	361.048	219.573		71.1018	93.2068	193.941	119.417
AT1G50900	138	159.67	361.048	219.573		71.1018	93.2068	193.941	119.417
AT1G64780	304.751	226.899	14.0668	181.906		56.289	31.9566	0	29.4152
AT4G13530	362.251	96.6423	65.6451	174.846		337.734	103.859	62.0612	167.885
AT3G14100	241.501	176.477	173.491	197.156		278.482	127.826	337.458	247.922
AT1G66580	230.001	218.496	140.668	196.388		121.466	114.511	93.0918	109.69
AT1G53310	138	239.505	267.269	214.925		337.734	583.208	465.459	462.134
AT3G51260	178.251	100.844	356.359	211.818		142.204	245.001	279.275	222.16
AT4G21210	293.251	84.0368	187.557	188.282		53.3264	58.5871	69.8189	60.5775
AT5G60410	232.876	151.266	211.002	198.381		151.091	138.479	135.759	141.776
AT4G27800	17.2501	12.6055	717.407	249.088		0	7.98916	314.185	107.391
AT5G48300	253.001	88.2386	248.514	196.584		151.091	21.3044	147.395	106.597
AT5G03520	126.5	268.918	253.203	216.207		195.53	282.284	349.094	275.636
AT1G42960	235.751	231.101	117.223	194.692		222.193	146.468	104.728	157.796
AT2G46220	186.876	105.046	332.914	208.279		56.289	23.9675	93.0918	57.7827
AT5G20700	51.7502	596.661	4.68894	217.7		38.5135	407.447	15.5153	153.825
AT4G21910	221.376	100.844	281.336	201.185		71.1018	63.9132	128.001	87.6721
AT4G27520	204.126	273.12	112.534	196.593		154.054	221.033	124.122	166.403
AT1G27450	201.251	184.881	215.691	200.608		343.659	340.871	279.275	321.268
AT3G24830	149.5	453.799	0	201.1		210.343	276.957	0	162.433
AT2G43090	204.126	214.294	178.18	198.866		79.9896	114.511	93.0918	95.8642
AT1G72030	215.626	121.853	262.58	200.02		109.615	53.261	69.8189	77.5651
AT4G30270	112.125	201.688	342.292	218.702		613.253	1198.37	2117.84	1309.82
AT3G09840	14.375	348.753	337.603	233.577		17.7755	476.686	391.761	295.408
AT3G60245	0	613.469	60.9562	224.808		0	239.675	46.5459	95.4069
AT1G54575	230.001	163.872	187.557	193.81		59.2515	45.2719	11.6365	38.72
AT1G26850	232.876	239.505	98.4677	190.283		453.274	567.23	244.366	421.623
AT2G37410	253.001	151.266	164.113	189.46		154.054	143.805	151.274	149.711
AT1G74560	319.126	138.661	70.334	176.04		159.979	63.9132	58.1824	94.0249
AT5G44190	281.751	210.092	51.5783	181.14		127.391	109.185	23.273	86.6163
AT4G32530	184.001	159.67	262.58	202.084		272.557	255.653	294.791	274.334
AT4G01150	0	655.487	9.37787	221.622		0	665.763	0	221.921
AT1G07700	224.251	33.6147	337.603	198.49		284.407	101.196	221.093	202.232
AT3G12320	163.876	201.688	248.514	204.692		112.578	95.8699	93.0918	100.513
AT5G40450	258.751	218.496	75.023	184.09		266.632	101.196	139.638	169.155
AT5G15850	112.125	117.652	426.693	218.823		8.88773	21.3044	58.1824	29.4582
AT2G45990	353.626	63.0276	93.7787	170.144		308.108	90.5438	15.5153	138.056
AT5G51970	195.501	67.2294	346.981	203.237		71.1018	47.9349	201.699	106.912
AT5G16880	232.876	239.505	93.7787	188.72		293.295	359.512	197.82	283.542
AT4G00860	132.25	243.707	248.514	208.157		183.68	263.642	290.912	246.078
AT1G15500	178.251	4.20184	440.76	207.737		50.3638	5.3261	131.88	62.5233
AT5G18130	224.251	155.468	196.935	192.218		124.428	66.5763	85.3342	92.1129
AT2G29290	224.251	134.459	220.38	193.03		5.92515	5.3261	0	3.75042
AT4G01690	293.251	29.4129	225.069	182.578		219.231	55.9241	139.638	138.264
AT3G17510	126.5	310.936	182.869	206.768		11.8503	31.9566	38.7883	27.5317
AT5G10980	86.2503	121.853	454.827	220.977		157.017	138.479	430.55	242.015
AT1G18660	264.501	268.918	0	177.806		177.755	149.131	3.87883	110.255
AT4G25740	40.2501	0	665.829	235.36		41.4761	0	310.306	117.261
AT2G04039	8.62503	315.138	365.737	229.833		8.88773	247.664	128.001	128.184
AT2G22670	232.876	226.899	98.4677	186.081		595.478	615.165	663.279	624.641
AT5G62350	201.251	126.055	257.891	195.066		79.9896	119.837	159.032	119.62
AT2G15020	172.501	210.092	211.002	197.865		14.8129	39.9458	23.273	26.0105
AT3G50770	212.751	180.679	178.18	190.536		11.8503	5.3261	3.87883	7.01841
AT5G58720	126.5	176.477	323.537	208.838		71.1018	111.848	360.731	181.227
AT3G63140	267.376	260.514	0	175.963		91.8399	101.196	0	64.3453
AT2G34250	120.75	201.688	300.092	207.51		189.605	298.262	318.064	268.643
AT4G31560	227.126	159.67	173.491	186.762		41.4761	26.6305	58.1824	42.0963
AT2G31110	109.25	92.4405	440.76	214.15		142.204	143.805	442.186	242.732
AT2G30766	195.501	176.477	206.313	192.764		0	5.3261	0	1.77537
AT4G30210	189.751	235.303	150.046	191.7		402.91	490.002	193.941	362.284
AT2G44650	17.2501	113.45	567.361	232.687		20.738	66.5763	290.912	126.075
AT4G25130	258.751	226.899	46.8894	177.513		53.3264	141.142	11.6365	68.7015
AT4G20380	342.126	58.8258	98.4677	166.473		269.594	167.772	217.214	218.194
AT1G68660	345.001	142.863	0	162.621		71.1018	79.8916	0	50.3311
AT5G61670	186.876	260.514	126.601	191.33		59.2515	119.837	93.0918	90.7269
AT5G23540	92.0003	126.055	431.382	216.479		88.8773	106.522	395.64	197.013
AT2G25670	218.501	126.055	225.069	189.875		106.653	106.522	193.941	135.705
AT1G65230	135.125	113.45	375.115	207.897		65.1767	69.2394	182.305	105.574
AT4G23850	186.876	268.918	112.534	189.443		136.279	234.349	116.365	162.331
AT1G22700	94.8753	340.349	182.869	206.031		151.091	151.794	116.365	139.75
AT5G47620	232.876	151.266	168.802	184.315		79.9896	127.826	11.6365	73.1508
AT3G13580	189.751	75.6331	323.537	196.307		168.867	189.077	337.458	231.8
AT1G67430	416.876	25.211	9.37787	150.488		136.279	15.9783	11.6365	54.6311
AT4G04610	204.126	155.468	206.313	188.636		592.515	556.578	457.701	535.598
AT2G41410	201.251	268.918	84.4008	184.856		151.091	234.349	69.8189	151.753
AT5G51010	138	189.083	276.647	201.243		29.6258	77.2285	124.122	76.9922
AT1G66330	414.001	0	37.5115	150.504		100.728	0	0	33.5759
AT4G21105	299.001	201.688	0	166.896		269.594	258.316	0	175.97
AT1G73010	158.125	63.0276	379.804	200.319		41.4761	13.3153	100.849	51.8803
AT3G22380	212.751	88.2386	262.58	187.857		168.867	79.8916	201.699	150.152
AT5G19590	270.251	239.505	0	169.919		228.118	298.262	0	175.46
AT2G46100	2.87501	394.973	262.58	220.143		8.88773	223.696	77.5765	103.387
AT1G78370	158.125	176.477	253.203	195.935		1339.08	1467.34	1885.11	1563.85
AT4G01850	235.751	285.725	0	173.825		1496.1	1278.26	0	924.789
AT1G19960	235.751	210.092	84.4008	176.748		204.418	149.131	54.3036	135.951
AT4G16490	215.626	88.2386	253.203	185.689		174.792	45.2719	93.0918	104.385
AT5G01220	232.876	117.652	192.246	180.925		44.4387	18.6414	38.7883	33.9561
AT1G74910	250.126	264.716	0	171.614		337.734	231.686	11.6365	193.685
AT2G39000	207.001	113.45	239.136	186.529		97.765	63.9132	232.73	131.469
AT3G26890	431.251	0	0	143.75		88.8773	0	0	29.6258
AT4G00430	109.25	226.899	271.958	202.703		47.4012	484.675	395.64	309.239
AT2G26670	212.751	0	356.359	189.703		154.054	0	139.638	97.8972
AT4G23630	92.0003	323.542	192.246	202.596		367.36	431.414	364.61	387.795
AT1G79510	258.751	142.863	121.912	174.509		47.4012	21.3044	46.5459	38.4172
AT1G18070	224.251	0	337.603	187.285		165.904	0	271.518	145.807
AT4G00370	227.126	226.899	75.023	176.349		91.8399	74.5655	23.273	63.2261
AT1G71500	301.876	184.881	0	162.252		177.755	93.2068	0	90.3205
AT1G11430	20.1251	298.331	332.914	217.123		14.8129	63.9132	108.607	62.4444
AT1G51680	230.001	100.844	211.002	180.616		2802.6	1358.16	1920.02	2026.92
AT1G27970	201.251	16.8074	351.67	189.909		192.567	0	434.428	208.999
AT2G28910	241.501	176.477	103.157	173.712		234.044	314.24	182.305	243.529
AT3G58680	201.251	201.688	140.668	181.202		130.353	173.098	120.244	141.232
AT3G09860	92.0003	163.872	361.048	205.64		56.289	122.5	298.67	159.153
AT3G25530	109.25	126.055	375.115	203.473		77.027	143.805	287.033	169.288
AT5G15320	276.001	218.496	0	164.832		213.306	194.403	0	135.903
AT5G03880	255.876	226.899	23.4447	168.74		130.353	181.088	15.5153	108.985
AT1G19670	166.751	113.45	295.403	191.868		14.8129	21.3044	58.1824	31.4332
AT2G20950	115	33.6147	468.894	205.836		59.2515	10.6522	124.122	64.6754
AT1G79270	163.876	184.881	220.38	189.712		8.88773	10.6522	34.9094	18.1498
AT1G74050	0	172.275	501.716	224.664		0	111.848	321.943	144.597
AT1G19450	247.251	197.486	70.334	171.69		115.54	141.142	46.5459	101.076
AT1G10470	112.125	235.303	248.514	198.647		26.6632	87.8807	81.4553	65.3331
AT4G29390	261.626	235.303	0	165.643		127.391	175.761	0	101.051
AT5G13930	247.251	134.459	135.979	172.563		50.3638	82.5546	62.0612	64.9932
AT2G37270	2.87501	613.469	0	205.448		8.88773	175.761	0	61.5497
AT5G21090	92.0003	319.34	182.869	198.07		53.3264	378.153	504.247	311.909
AT5G24520	250.126	151.266	112.534	171.309		186.642	95.8699	81.4553	121.323
AT4G28750	5.75002	4.20184	670.518	226.823		0	2.66305	608.976	203.88
AT5G58260	258.751	109.248	140.668	169.556		219.231	53.261	69.8189	114.104
AT1G45230	92.0003	218.496	290.714	200.403		41.4761	42.6088	77.5765	53.8871
AT1G69510	336.376	121.853	0	152.743		551.039	210.381	0	253.807
AT1G14320	419.751	0	0	139.917		219.231	15.9783	0	78.403
AT1G54270	60.3752	88.2386	482.96	210.525		71.1018	85.2177	318.064	158.128
AT2G37190	143.75	218.496	201.624	187.957		100.728	90.5438	178.426	123.232
AT2G46690	158.125	121.853	286.025	188.668		41.4761	79.8916	77.5765	66.3147
AT3G62400	161.001	37.8166	375.115	191.311		237.006	47.9349	411.156	232.032
AT5G09230	235.751	147.064	131.29	171.368		174.792	130.49	162.911	156.064
AT4G39800	100.625	273.12	211.002	194.916		100.728	343.534	197.82	214.027
AT4G28240	238.626	256.312	0	164.979		121.466	119.837	0	80.4343
AT5G23900	126.5	201.688	243.825	190.671		74.0644	61.2502	128.001	87.772
AT2G36830	215.626	159.67	145.357	173.551		586.59	471.36	453.823	503.924
AT2G44860	224.251	277.321	0	167.191		106.653	143.805	0	83.4859
AT4G34710	385.251	42.0184	0	142.423		47.4012	15.9783	0	21.1265
AT1G63980	189.751	218.496	121.912	176.72		136.279	207.718	147.395	163.797
AT1G17880	14.375	348.753	262.58	208.569		8.88773	167.772	147.395	108.018
AT5G65210	189.751	201.688	140.668	177.369		266.632	191.74	162.911	207.094
AT4G33050	218.501	252.11	37.5115	169.374		130.353	95.8699	31.0306	85.7513
AT1G32790	293.251	176.477	0	156.576		343.659	197.066	7.75765	182.827
AT5G10960	138	218.496	201.624	186.04		32.5883	175.761	252.124	153.491
AT4G17840	161.001	180.679	206.313	182.664		94.8025	122.5	89.213	102.172
AT3G52930	97.7503	4.20184	506.405	202.786		456.237	23.9675	1380.86	620.355
AT3G44450	201.251	96.6423	229.758	175.884		38.5135	63.9132	116.365	72.9305
AT1G50020	250.126	0	257.891	169.339		79.9896	0	108.607	62.8656
AT3G29240	224.251	210.092	65.6451	166.663		225.156	245.001	116.365	195.507
AT5G65010	189.751	168.074	168.802	175.542		23.7006	63.9132	62.0612	49.8917
AT4G14960	161.001	0	403.248	188.083		1345.01	0	4018.46	1787.82
AT4G38600	143.75	142.863	271.958	186.19		17.7755	197.066	139.638	118.16
AT5G17170	0	285.725	346.981	210.902		11.8503	122.5	217.214	117.188
AT5G18310	143.75	184.881	225.069	184.567		82.9521	149.131	217.214	149.766
AT4G31300	184.001	176.477	168.802	176.427		201.455	234.349	333.579	256.461
AT4G23680	281.751	184.881	0	155.544		0	5.3261	0	1.77537
AT3G10420	241.501	243.707	0	161.736		94.8025	143.805	0	79.5358
AT2G20900	258.751	50.4221	187.557	165.577		237.006	31.9566	224.972	164.645
AT3G57050	120.75	327.743	98.4677	182.321		195.53	351.523	523.641	356.898
AT4G02260	207.001	126.055	182.869	171.975		133.316	87.8807	93.0918	104.763
AT1G11310	140.875	159.67	253.203	184.583		65.1767	127.826	147.395	113.466
AT3G22210	209.876	281.523	0	163.8		47.4012	119.837	0	55.7462
AT2G47940	241.501	117.652	131.29	163.481		94.8025	101.196	77.5765	91.1916
AT1G49750	126.5	176.477	253.203	185.393		168.867	181.088	217.214	189.056
AT5G07370	195.501	134.459	187.557	172.506		189.605	191.74	77.5765	152.974
AT5G53050	250.126	163.872	65.6451	159.881		79.9896	143.805	50.4247	91.4064
AT1G14270	184.001	134.459	206.313	174.924		130.353	85.2177	62.0612	92.5441
AT5G24930	253.001	105.046	126.601	161.549		183.68	114.511	112.486	136.892
AT4G28030	74.7502	142.863	375.115	197.576		53.3264	63.9132	93.0918	70.1105
AT4G38130	155.25	50.4221	346.981	184.218		201.455	106.522	372.367	226.782
AT2G36145	146.625	168.074	229.758	181.486		38.5135	45.2719	54.3036	46.0296
AT1G24510	92.0003	226.899	253.203	190.701		195.53	218.37	302.548	238.816
AT1G12250	333.501	8.40368	103.157	148.354		248.856	0	15.5153	88.1239
AT5G23060	247.251	8.40368	243.825	166.493		82.9521	0	73.6977	52.2166
AT5G16050	178.251	197.486	145.357	173.698		136.279	194.403	120.244	150.308
AT5G02120	396.751	8.40368	0	135.052		142.204	0	0	47.4012
AT1G74060	0	210.092	422.004	210.699		0	109.185	190.062	99.7492
AT3G17790	135.125	189.083	220.38	181.529		5.92515	34.6197	0	13.5149
AT5G51720	175.376	130.257	220.38	175.338		177.755	79.8916	174.547	144.064
AT2G15620	175.376	130.257	220.38	175.338		62.2141	26.6305	100.849	63.2314
AT1G43670	201.251	163.872	135.979	167.034		79.9896	77.2285	100.849	86.0225
AT2G38540	304.751	0	150.046	151.599		331.809	0	100.849	144.219
AT3G51860	178.251	281.523	42.2004	167.325		47.4012	61.2502	38.7883	49.1466
AT5G41680	132.25	176.477	234.447	181.058		148.129	149.131	279.275	192.178
AT3G62120	166.751	336.147	0	167.633		124.428	154.457	0	92.9617
AT1G50250	181.126	142.863	192.246	172.078		109.615	61.2502	85.3342	85.3999
AT3G30390	17.2501	420.184	150.046	195.827		11.8503	671.089	131.88	271.606
AT2G29350	155.25	214.294	154.735	174.76		248.856	207.718	186.184	214.253
AT3G51420	155.25	105.046	276.647	178.981		29.6258	21.3044	65.94	38.9567
AT4G37925	310.501	126.055	0	145.519		88.8773	55.9241	0	48.2671
AT5G57655	155.25	210.092	159.424	174.922		100.728	175.761	93.0918	123.194
AT2G43910	23.0001	546.239	0	189.746		0	133.153	0	44.3842
AT2G29630	201.251	142.863	159.424	167.846		59.2515	90.5438	100.849	83.5483
AT1G28600	5.75002	252.11	356.359	204.74		0	101.196	155.153	85.4497
AT5G53560	175.376	138.661	201.624	171.887		248.856	274.294	422.792	315.314
AT5G16470	241.501	222.697	0	154.733		151.091	239.675	0	130.255
AT1G65820	230.001	172.275	75.023	159.1		186.642	101.196	100.849	129.563
AT5G19940	5.75002	567.248	0	190.999		0	247.664	0	82.5546
AT1G20380	132.25	147.064	262.58	180.632		29.6258	18.6414	42.6671	30.3114
AT3G13120	80.5003	231.101	253.203	188.268		50.3638	119.837	58.1824	76.1278
AT3G17930	8.62503	130.257	482.96	207.281		2.96258	90.5438	182.305	91.937
AT5G16400	158.125	210.092	150.046	172.754		162.942	122.5	100.849	128.764
AT4G33510	120.75	184.881	234.447	180.026		62.2141	87.8807	112.486	87.5269
AT5G17870	244.376	210.092	4.68894	153.052		77.027	133.153	0	70.0599
AT4G28660	138	151.266	243.825	177.697		35.5509	26.6305	108.607	56.9295
AT1G67360	74.7502	100.844	403.248	192.948		94.8025	133.153	480.974	236.31
AT1G16810	149.5	252.11	112.534	171.382		100.728	250.327	124.122	158.392
AT1G22750	138	352.955	18.7557	169.904		106.653	223.696	0	110.116
AT3G51800	172.501	168.074	168.802	169.792		142.204	74.5655	178.426	131.732
AT1G56200	92.0003	193.285	271.958	185.748		47.4012	143.805	147.395	112.867
AT1G76180	0	563.047	9.37787	190.808		2.96258	2311.53	34.9094	783.134
AT3G52590	0	567.248	4.68894	190.646		0	410.11	3.87883	137.996
AT3G27430	230.001	235.303	0	155.101		266.632	223.696	23.273	171.2
AT1G80380	310.501	117.652	0	142.717		266.632	74.5655	0	113.732
AT5G65380	169.626	176.477	164.113	170.072		2.96258	7.98916	7.75765	6.23646
AT4G31390	241.501	75.6331	159.424	158.853		47.4012	26.6305	38.7883	37.6067
AT3G25520	273.126	172.275	0	148.467		139.241	117.174	0	85.4718
AT2G45670	138	126.055	271.958	178.671		106.653	154.457	201.699	154.27
AT3G11660	155.25	159.67	201.624	172.182		231.081	165.109	306.427	234.206
AT1G64900	192.626	58.8258	253.203	168.218		50.3638	47.9349	108.607	68.9686
AT1G79230	250.126	163.872	42.2004	152.066		239.969	167.772	34.9094	147.55
AT5G45410	232.876	0	253.203	162.026		186.642	0	151.274	112.639
AT5G36170	43.1251	163.872	379.804	195.6		17.7755	63.9132	209.457	97.0484
AT5G43750	195.501	155.468	140.668	163.879		79.9896	101.196	131.88	104.355
AT1G74880	181.126	126.055	196.935	168.039		50.3638	34.6197	62.0612	49.0149
AT5G53120	172.501	210.092	117.223	166.605		873.96	719.024	446.065	679.683
AT3G52210	310.501	50.4221	70.334	143.752		195.53	39.9458	46.5459	94.0073
AT5G01820	115	184.881	234.447	178.109		91.8399	87.8807	128.001	102.574
AT1G64680	172.501	184.881	140.668	166.017		41.4761	69.2394	42.6671	51.1275
AT3G10450	143.75	352.955	0	165.568		189.605	234.349	0	141.318
AT3G60340	184.001	151.266	159.424	164.897		195.53	202.392	139.638	179.187
AT1G67350	264.501	176.477	0	146.993		302.183	250.327	0	184.17
AT2G01320	161.001	75.6331	281.336	172.657		47.4012	53.261	201.699	100.787
AT3G15580	230.001	176.477	56.2672	154.248		174.792	159.783	58.1824	130.919
AT3G63190	195.501	210.092	75.023	160.205		41.4761	63.9132	38.7883	48.0592
AT5G14800	97.7503	67.2294	393.871	186.283		35.5509	26.6305	54.3036	38.8283
AT3G57020	258.751	159.67	28.1336	148.851		59.2515	26.6305	7.75765	31.2132
AT1G15960	201.251	235.303	37.5115	158.022		666.58	540.6	112.486	439.888
AT5G20900	198.376	25.211	271.958	165.182		293.295	26.6305	457.701	259.209
AT2G16500	69.0002	105.046	393.871	189.306		62.2141	69.2394	46.5459	59.3331
AT1G55480	97.7503	193.285	248.514	179.85		50.3638	98.5329	143.517	97.4711
AT1G01320	299.001	16.8074	117.223	144.344		103.69	5.3261	42.6671	50.5611
AT1G59870	267.376	163.872	4.68894	145.312		195.53	149.131	7.75765	117.473
AT1G22930	244.376	117.652	93.7787	151.935		77.027	95.8699	124.122	99.0064
AT3G49870	123.625	109.248	295.403	176.092		145.166	194.403	519.763	286.444
AT1G55840	86.2503	142.863	318.848	182.653		183.68	175.761	287.033	215.491
AT5G40500	109.25	134.459	290.714	178.141		136.279	106.522	387.883	210.228
AT1G80780	115	184.881	225.069	174.983		94.8025	106.522	108.607	103.311
AT4G31170	94.8753	113.45	337.603	181.976		97.765	119.837	186.184	134.595
AT2G44870	169.626	79.835	253.203	167.554		41.4761	21.3044	81.4553	48.0786
AT3G05530	172.501	126.055	196.935	165.164		180.717	175.761	135.759	164.079
AT5G58060	94.8753	25.211	436.071	185.386		180.717	66.5763	508.126	251.807
AT2G05710	238.626	193.285	14.0668	148.659		222.193	149.131	11.6365	127.654
AT5G58320	2.87501	21.0092	590.806	204.897		71.1018	63.9132	302.548	145.854
AT4G18070	46.0001	67.2294	468.894	194.041		165.904	300.925	1070.56	512.462
AT5G53850	129.375	126.055	267.269	174.233		71.1018	71.9024	267.639	136.881
AT1G32230	212.751	92.4405	168.802	157.998		367.36	314.24	248.245	309.948
AT1G15750	195.501	168.074	112.534	158.703		213.306	117.174	77.5765	136.019
AT1G23390	86.2503	46.2202	422.004	184.825		29.6258	21.3044	143.517	64.8156
AT1G71490	241.501	4.20184	215.691	153.798		68.1393	0	89.213	52.4508
AT1G53910	207.001	134.459	126.601	156.02		311.071	303.588	256.002	290.22
AT5G47560	250.126	184.881	0	145.002		62.2141	37.2827	0	33.1656
AT3G48990	166.751	75.6331	257.891	166.758		127.391	39.9458	89.213	85.5165
AT1G71480	241.501	4.20184	215.691	153.798		71.1018	0	89.213	53.4383
AT1G02820	255.876	176.477	0	144.118		20.738	15.9783	0	12.2388
AT5G43150	195.501	260.514	0	152.005		225.156	311.577	0	178.911
AT1G12440	310.501	92.4405	0	134.314		408.836	117.174	0	175.337
AT1G23820	258.751	168.074	0	142.275		136.279	133.153	0	89.8104
AT5G39570	207.001	88.2386	173.491	156.243		817.671	268.968	907.645	664.762
AT1G34030	103.5	100.844	328.226	177.523		68.1393	98.5329	221.093	129.255
AT5G48850	37.3751	109.248	426.693	191.105		0	10.6522	11.6365	7.42956
AT1G58180	166.751	63.0276	267.269	165.682		91.8399	87.8807	128.001	102.574
AT2G32090	166.751	117.652	206.313	163.572		100.728	154.457	143.517	132.9
AT5G20010	11.5	105.046	473.583	196.71		20.738	90.5438	539.157	216.813
AT5G52470	11.5	16.8074	572.05	200.119		11.8503	0	147.395	53.0819
AT5G08280	161.001	37.8166	304.781	167.866		62.2141	37.2827	186.184	95.2268
AT4G31580	143.75	58.8258	309.47	170.682		23.7006	53.261	256.002	110.988
AT1G17370	287.501	117.652	9.37787	138.177		284.407	133.153	7.75765	141.773
AT4G00880	161.001	92.4405	239.136	164.192		97.765	143.805	162.911	134.827
AT1G13360	0	252.11	323.537	191.882		2.96258	157.12	182.305	114.129
AT3G07360	163.876	189.083	126.601	159.853		275.52	407.447	128.001	270.323
AT2G21270	155.25	214.294	112.534	160.693		231.081	167.772	104.728	167.861
AT1G72150	155.25	214.294	112.534	160.693		287.37	418.099	193.941	299.803
AT3G25760	135.125	336.147	9.37787	160.217		2.96258	5.3261	0	2.76289
AT5G54600	83.3753	420.184	0	167.853		74.0644	258.316	0	110.793
AT2G29340	143.75	0	370.426	171.392		100.728	0	387.883	162.87
AT2G16365	241.501	88.2386	112.534	147.425		130.353	74.5655	54.3036	86.4075
AT4G03260	132.25	147.064	225.069	168.128		59.2515	109.185	201.699	123.379
AT1G32900	106.375	264.716	135.979	169.023		0	77.2285	50.4247	42.5511
AT4G11150	201.251	243.707	0	148.319		382.172	468.697	0	283.623
AT5G67360	146.625	92.4405	257.891	165.652		237.006	205.055	349.094	263.718
AT2G31610	161.001	96.6423	229.758	162.467		103.69	87.8807	54.3036	81.9582
AT3G12965	0	315.138	248.514	187.884		0	127.826	38.7883	55.5383
AT3G14110	184.001	134.459	150.046	156.168		118.503	79.8916	147.395	115.263
AT1G05900	28.7501	168.074	365.737	187.52		17.7755	69.2394	217.214	101.41
AT3G28900	152.375	210.092	117.223	159.897		68.1393	42.6088	42.6671	51.1384
AT1G70580	11.5	487.413	37.5115	178.808		0	223.696	0	74.5655
AT1G72550	138	142.863	215.691	165.518		171.829	79.8916	131.88	127.867
AT1G16890	0	226.899	346.981	191.294		0	295.599	310.306	201.968
AT1G03475	146.625	109.248	239.136	165.003		71.1018	53.261	108.607	77.6567
AT5G16010	100.625	92.4405	328.226	173.764		74.0644	63.9132	197.82	111.933
AT3G23920	123.625	138.661	239.136	167.141		56.289	55.9241	147.395	86.5361
AT5G57350	184.001	138.661	140.668	154.443		77.027	55.9241	7.75765	46.9029
AT3G27160	94.8753	0	440.76	178.545		35.5509	0	131.88	55.8103
AT3G51510	178.251	92.4405	201.624	157.438		136.279	58.5871	120.244	105.036
AT2G03440	192.626	121.853	140.668	151.716		162.942	125.163	131.88	139.995
AT2G47450	143.75	235.303	93.7787	157.611		97.765	127.826	73.6977	99.7631
AT3G52990	92.0003	126.055	300.092	172.716		142.204	239.675	411.156	264.345
AT5G52650	362.251	0	0	120.75		159.979	0	0	53.3264
AT2G21660	132.25	218.496	131.29	160.679		284.407	644.459	263.76	397.542
AT5G48760	241.501	42.0184	150.046	144.522		118.503	69.2394	93.0918	93.6114
AT5G51040	281.751	117.652	0	133.134		242.931	90.5438	0	111.158
AT5G53170	149.5	193.285	131.29	158.025		88.8773	133.153	93.0918	105.041
AT5G12150	166.751	142.863	159.424	156.346		183.68	170.435	170.668	174.928
AT4G19160	172.501	12.6055	295.403	160.17		124.428	7.98916	267.639	133.352
AT3G60820	212.751	218.496	0	143.749		237.006	234.349	0	157.118
AT3G57520	189.751	126.055	140.668	152.158		44.4387	7.98916	23.273	25.2336
AT1G49950	34.5001	163.872	351.67	183.347		35.5509	135.816	256.002	142.456
AT1G48410	184.001	33.6147	253.203	156.939		11.8503	85.2177	620.612	239.227
AT5G24690	129.375	92.4405	271.958	164.591		35.5509	85.2177	155.153	91.9739
AT1G02930	198.376	159.67	84.4008	147.482		29.6258	15.9783	19.3941	21.6661
AT2G17360	267.376	12.6055	135.979	138.653		183.68	2.66305	143.517	109.953
AT2G48070	207.001	67.2294	173.491	149.24		100.728	50.598	46.5459	65.9572
AT1G02850	115	357.156	0	157.386		14.8129	13.3153	0	9.37605
AT4G19110	146.625	63.0276	276.647	162.1		204.418	93.2068	256.002	184.542
AT2G20890	129.375	231.101	117.223	159.233		121.466	138.479	85.3342	115.093
AT1G70782	227.126	189.083	4.68894	140.299		242.931	119.837	42.6671	135.145
AT1G70780	227.126	189.083	4.68894	140.299		242.931	119.837	42.6671	135.145
AT1G27770	92.0003	134.459	286.025	170.828		41.4761	175.761	279.275	165.504
AT1G16840	94.8753	16.8074	412.626	174.77		91.8399	362.175	589.581	347.865
AT2G18162	209.876	176.477	42.2004	142.851		151.091	165.109	42.6671	119.623
AT2G18160	209.876	176.477	42.2004	142.851		151.091	165.109	42.6671	119.623
AT2G45640	117.875	147.064	225.069	163.336		50.3638	125.163	139.638	105.055
AT2G30970	178.251	92.4405	187.557	152.749		165.904	79.8916	93.0918	112.963
AT2G18300	195.501	184.881	56.2672	145.55		53.3264	26.6305	46.5459	42.1676
AT4G38920	204.126	142.863	89.0898	145.359		269.594	183.751	143.517	198.954
AT3G45050	25.8751	126.055	398.56	183.497		8.88773	74.5655	162.911	82.1213
AT2G47710	195.501	172.275	70.334	146.037		174.792	149.131	69.8189	131.247
AT5G40890	120.75	142.863	225.069	162.894		41.4761	10.6522	62.0612	38.0632
AT3G26060	132.25	222.697	117.223	157.39		127.391	162.446	69.8189	119.885
AT4G28300	166.751	84.0368	215.691	155.493		189.605	175.761	333.579	232.982
AT2G35370	350.751	4.20184	4.68894	119.881		237.006	5.3261	7.75765	83.3633
AT2G46390	186.876	243.707	0	143.527		257.744	210.381	0	156.042
AT4G12600	129.375	117.652	234.447	160.491		59.2515	55.9241	58.1824	57.786
AT5G23920	97.7503	172.275	225.069	165.032		44.4387	117.174	96.9706	86.1945
AT4G14160	138	226.899	98.4677	154.456		177.755	335.545	139.638	217.646
AT2G21195	181.126	100.844	168.802	150.257		133.316	127.826	116.365	125.836
AT1G67280	264.501	4.20184	140.668	136.457		124.428	2.66305	69.8189	65.6367
AT5G24165	0	516.826	0	172.275		0	215.707	0	71.9024
AT1G54500	261.626	130.257	0	130.628		186.642	103.859	0	96.8338
AT5G13770	117.875	222.697	131.29	157.288		23.7006	106.522	58.1824	62.8017
AT5G37510	166.751	126.055	159.424	150.743		254.782	245.001	100.849	200.211
AT5G06043	350.751	0	0	116.917		91.8399	0	0	30.6133
AT3G61110	267.376	121.853	0	129.743		145.166	151.794	0	98.9867
AT4G17530	163.876	117.652	173.491	151.673		370.322	207.718	290.912	289.651
AT1G73920	235.751	84.0368	93.7787	137.855		82.9521	53.261	85.3342	73.8491
AT3G44110	333.501	8.40368	18.7557	120.22		432.536	15.9783	7.75765	152.091
AT3G13040	109.25	210.092	159.424	159.589		112.578	122.5	209.457	148.178
AT5G43460	48.8752	172.275	295.403	172.185		41.4761	189.077	290.912	173.822
AT1G69410	132.25	126.055	211.002	156.436		118.503	122.5	224.972	155.325
AT1G16320	117.875	126.055	234.447	159.459		38.5135	63.9132	108.607	70.3446
AT5G27700	212.751	197.486	0	136.746		186.642	260.979	3.87883	150.5
AT5G20150	204.126	210.092	0	138.073		5.92515	5.3261	0	3.75042
AT3G27240	161.001	0	304.781	155.26		115.54	0	240.487	118.676
AT5G11670	181.126	159.67	89.0898	143.295		109.615	231.686	108.607	149.969
AT5G20230	126.5	75.6331	271.958	158.031		79.9896	79.8916	162.911	107.597
AT4G13010	186.876	21.0092	234.447	147.444		85.9147	10.6522	162.911	86.4925
AT3G02200	74.7502	134.459	290.714	166.641		88.8773	101.196	240.487	143.52
AT5G17710	11.5	142.863	384.493	179.618		0	42.6088	77.5765	40.0618
AT1G65930	158.125	197.486	84.4008	146.671		210.343	189.077	81.4553	160.292
AT4G38225	198.376	214.294	0	137.556		74.0644	34.6197	0	36.228
AT5G16540	112.125	113.45	253.203	159.593		17.7755	95.8699	174.547	96.0642
AT3G56240	195.501	218.496	0	137.999		171.829	202.392	0	124.74
AT5G19220	100.625	256.312	112.534	156.491		53.3264	106.522	46.5459	68.7981
AT5G64130	232.876	163.872	0	132.249		382.172	247.664	11.6365	213.824
AT5G55160	207.001	201.688	0	136.23		165.904	154.457	0	106.787
AT3G02870	207.001	189.083	14.0668	136.717		319.958	311.577	11.6365	214.391
AT2G36060	43.1251	365.56	84.4008	164.362		88.8773	391.469	128.001	202.782
AT2G05840	207.001	126.055	84.4008	139.152		231.081	159.783	100.849	163.905
AT1G48520	34.5001	100.844	393.871	176.405		53.3264	23.9675	116.365	64.5529
AT1G22300	345.001	0	0	115		699.168	23.9675	11.6365	244.924
AT2G40880	198.376	109.248	112.534	140.053		157.017	119.837	108.607	128.487
AT1G08520	181.126	138.661	107.846	142.544		77.027	101.196	62.0612	80.0947
AT4G23890	117.875	243.707	93.7787	151.787		71.1018	85.2177	69.8189	75.3795
AT5G66490	152.375	134.459	159.424	148.753		62.2141	34.6197	77.5765	58.1368
AT3G03990	89.1253	117.652	281.336	162.704		11.8503	15.9783	15.5153	14.448
AT5G27770	0	134.459	407.937	180.799		0	117.174	124.122	80.4322
AT2G21940	181.126	88.2386	164.113	144.492		198.493	66.5763	252.124	172.398
AT1G14450	178.251	54.6239	206.313	146.396		198.493	111.848	143.517	151.286
AT3G56490	163.876	172.275	98.4677	144.873		71.1018	130.49	54.3036	85.2983
AT5G64460	201.251	205.89	0	135.714		228.118	167.772	27.1518	141.014
AT3G25770	232.876	100.844	65.6451	133.122		0	0	0	0
AT4G37200	126.5	189.083	140.668	152.084		53.3264	82.5546	38.7883	58.2231
AT2G48020	178.251	58.8258	201.624	146.234		35.5509	15.9783	54.3036	35.2776
AT4G16450	97.7503	163.872	211.002	157.541		124.428	199.729	345.215	223.124
AT1G19740	123.625	126.055	211.002	153.561		26.6632	53.261	65.94	48.6214
AT4G09000	339.251	0	0	113.084		441.424	2.66305	0	148.029
AT1G53850	224.251	168.074	0	130.775		248.856	250.327	0	166.394
AT1G52410	97.7503	159.67	215.691	157.704		136.279	218.37	178.426	177.692
AT1G17280	126.5	84.0368	253.203	154.58		88.8773	138.479	279.275	168.877
AT2G29670	158.125	92.4405	192.246	147.604		44.4387	29.2936	77.5765	50.4362
AT3G15660	143.75	84.0368	225.069	150.952		159.979	122.5	279.275	187.252
AT3G19800	166.751	0	281.336	149.362		65.1767	0	147.395	70.8574
AT3G12490	178.251	8.40368	253.203	146.619		314.033	63.9132	868.857	415.601
AT5G23610	138	100.844	215.691	151.512		124.428	95.8699	116.365	112.221
AT3G26070	250.126	130.257	0	126.794		195.53	117.174	0	104.235
AT5G48160	120.75	193.285	140.668	151.568		148.129	213.044	77.5765	146.25
AT1G48450	241.501	50.4221	103.157	131.693		124.428	63.9132	93.0918	93.8111
AT5G63570	138	155.468	154.735	149.401		68.1393	95.8699	69.8189	77.9427
AT5G61020	201.251	0	225.069	142.107		88.8773	0	54.3036	47.727
AT5G19540	163.876	92.4405	182.869	146.395		88.8773	42.6088	62.0612	64.5158
AT3G13470	37.3751	155.468	318.848	170.564		14.8129	47.9349	58.1824	40.3101
AT2G37480	92.0003	151.266	234.447	159.238		195.53	229.022	294.791	239.781
AT2G30140	195.501	109.248	112.534	139.094		82.9521	79.8916	46.5459	69.7965
AT1G30580	270.251	92.4405	9.37787	124.023		157.017	109.185	15.5153	93.9057
AT1G16240	232.876	151.266	0	128.047		328.846	295.599	0	208.148
AT4G30480	112.125	37.8166	323.537	157.826		124.428	119.837	314.185	186.15
AT1G27760	276.001	0	98.4677	124.823		53.3264	0	69.8189	41.0484
AT5G23450	215.626	138.661	42.2004	132.162		364.397	186.414	104.728	218.513
AT4G34150	155.25	142.863	135.979	144.697		278.482	292.936	193.941	255.12
AT3G11170	0	277.321	234.447	170.589		2.96258	149.131	104.728	85.6073
AT5G49480	0	403.377	93.7787	165.718		0	71.9024	27.1518	33.0181
AT4G18120	132.25	117.652	196.935	148.946		177.755	149.131	263.76	196.882
AT1G45000	0	134.459	393.871	176.11		0	250.327	418.913	223.08
AT1G16560	195.501	100.844	112.534	136.293		355.509	181.088	46.5459	194.381
AT5G05200	184.001	67.2294	168.802	140.011		79.9896	55.9241	104.728	80.214
AT4G28025	161.001	105.046	164.113	143.386		100.728	69.2394	42.6671	70.878
AT2G42690	212.751	134.459	46.8894	131.366		139.241	127.826	50.4247	105.831
AT3G17185	74.7502	201.688	196.935	157.791		47.4012	58.5871	85.3342	63.7742
AT2G34310	146.625	142.863	145.357	144.948		44.4387	106.522	93.0918	81.3508
AT4G08850	109.25	84.0368	271.958	155.082		65.1767	31.9566	96.9706	64.7013
AT5G06360	175.376	58.8258	192.246	142.149		88.8773	58.5871	58.1824	68.5489
AT1G08200	135.125	96.6423	215.691	149.153		311.071	266.305	407.277	328.217
AT1G01910	132.25	172.275	135.979	146.835		231.081	191.74	135.759	186.193
AT5G61270	120.75	109.248	225.069	151.689		35.5509	26.6305	77.5765	46.586
AT5G48810	135.125	109.248	201.624	148.666		346.621	492.665	508.126	449.137
AT1G70770	310.501	25.211	4.68894	113.467		174.792	47.9349	23.273	82
AT4G17390	2.87501	479.01	0	160.628		0	199.729	0	66.5763
AT3G08730	126.5	75.6331	248.514	150.216		29.6258	23.9675	89.213	47.6021
AT1G09640	146.625	117.652	168.802	144.36		139.241	77.2285	182.305	132.925
AT3G17210	135.125	163.872	135.979	144.992		281.445	205.055	166.789	217.763
AT3G26030	123.625	29.4129	304.781	152.606		106.653	39.9458	197.82	114.806
AT4G04830	244.376	126.055	0	123.477		263.669	125.163	0	129.611
AT1G54080	178.251	16.8074	229.758	141.605		183.68	15.9783	232.73	144.129
AT2G04410	158.125	0	276.647	144.924		311.071	0	422.792	244.621
AT3G56360	115	231.101	89.0898	145.064		65.1767	175.761	62.0612	101
AT2G36460	92.0003	210.092	150.046	150.713		154.054	218.37	155.153	175.859
AT3G46060	215.626	163.872	0	126.499		337.734	311.577	0	216.437
AT2G11910	212.751	75.6331	103.157	130.513		71.1018	127.826	131.88	110.269
AT4G13495	28.7501	210.092	253.203	164.015		17.7755	111.848	116.365	81.9961
AT1G50320	48.8752	256.312	168.802	157.996		17.7755	106.522	89.213	71.1702
AT2G15970	152.375	176.477	89.0898	139.314		367.36	410.11	224.972	334.147
AT2G25210	83.3753	252.11	117.223	150.903		100.728	130.49	159.032	130.083
AT3G14990	138	0	309.47	149.157		106.653	0	174.547	93.7333
AT4G29810	224.251	88.2386	70.334	127.608		275.52	143.805	81.4553	166.927
AT2G22540	152.375	100.844	173.491	142.237		68.1393	79.8916	96.9706	81.6672
AT1G78630	181.126	201.688	14.0668	132.294		91.8399	109.185	11.6365	70.8872
AT3G60240	181.126	214.294	0	131.806		168.867	231.686	23.273	141.275
AT3G56190	178.251	134.459	93.7787	135.496		349.584	340.871	240.487	310.314
AT2G42750	255.876	12.6055	103.157	123.879		112.578	2.66305	73.6977	62.9796
AT1G04530	161.001	58.8258	206.313	142.046		47.4012	45.2719	73.6977	55.4569
AT4G11600	115	243.707	70.334	143.014		74.0644	175.761	62.0612	103.962
AT1G30400	112.125	84.0368	253.203	149.788		65.1767	79.8916	139.638	94.902
AT2G35830	115	92.4405	239.136	148.859		56.289	66.5763	112.486	78.4504
AT3G07230	0	474.808	0	158.269		0	324.892	0	108.297
AT5G60680	146.625	126.055	145.357	139.346		165.904	207.718	159.032	177.551
AT2G35490	152.375	151.266	107.846	137.162		103.69	45.2719	58.1824	69.0482
AT1G64510	221.376	147.064	0	122.813		74.0644	55.9241	0	43.3295
AT3G61050	195.501	151.266	37.5115	128.093		189.605	234.349	7.75765	143.904
AT3G15730	212.751	63.0276	107.846	127.875		648.804	87.8807	364.61	367.098
AT4G37830	0	168.074	337.603	168.559		0	394.132	473.217	289.116
AT5G59080	89.1253	100.844	267.269	152.413		5.92515	5.3261	23.273	11.5081
AT3G26710	166.751	100.844	140.668	136.088		35.5509	31.9566	58.1824	41.8966
AT1G12650	126.5	50.4221	262.58	146.501		23.7006	42.6088	93.0918	53.1338
AT5G63800	218.501	151.266	0	123.256		59.2515	37.2827	0	32.1781
AT5G47110	129.375	218.496	70.334	139.402		103.69	173.098	62.0612	112.95
AT5G27640	166.751	151.266	84.4008	134.139		136.279	127.826	54.3036	106.136
AT1G54360	161.001	134.459	112.534	135.998		284.407	53.261	93.0918	143.587
AT5G50810	51.7502	100.844	328.226	160.273		53.3264	42.6088	182.305	92.7467
AT5G59890	189.751	193.285	0	127.678		491.788	474.023	7.75765	324.523
AT4G35250	2.87501	222.697	271.958	165.844		0	63.9132	89.213	51.0421
AT2G39950	115	117.652	206.313	146.322		17.7755	53.261	0	23.6788
AT3G58990	66.1252	134.459	262.58	154.388		343.659	660.437	899.888	634.661
AT3G12630	138	126.055	154.735	139.597		100.728	199.729	294.791	198.416
AT1G04480	0	75.6331	436.071	170.568		0	95.8699	135.759	77.2096
AT1G12800	163.876	214.294	14.0668	130.745		59.2515	98.5329	11.6365	56.4736
AT4G13250	126.5	4.20184	309.47	146.724		38.5135	2.66305	116.365	52.5138
AT5G61170	140.875	109.248	168.802	139.642		47.4012	23.9675	85.3342	52.2343
AT2G24790	175.376	210.092	0	128.489		198.493	250.327	7.75765	152.192
AT1G17290	120.75	142.863	164.113	142.575		88.8773	79.8916	124.122	97.6304
AT4G36690	129.375	163.872	126.601	139.949		142.204	143.805	139.638	141.882
AT2G41870	135.125	84.0368	206.313	141.825		88.8773	79.8916	143.517	104.095
AT1G01090	129.375	88.2386	211.002	142.872		74.0644	106.522	147.395	109.327
AT5G22000	224.251	12.6055	140.668	125.841		124.428	55.9241	197.82	126.057
AT5G16840	319.126	0	0	106.375		275.52	0	0	91.8399
AT4G23470	207.001	163.872	0	123.624		248.856	314.24	0	187.699
AT1G45145	143.75	256.312	0	133.354		171.829	415.436	0	195.755
AT1G71340	129.375	96.6423	196.935	140.984		79.9896	53.261	116.365	83.2051
AT5G35680	0	268.918	215.691	161.536		0	266.305	310.306	192.204
AT4G01050	149.5	218.496	28.1336	132.043		121.466	130.49	3.87883	85.278
AT3G06680	74.7502	352.955	0	142.568		59.2515	138.479	0	65.9101
AT4G32720	138	92.4405	187.557	139.333		94.8025	63.9132	38.7883	65.8347
AT2G04790	97.7503	285.725	37.5115	140.329		17.7755	31.9566	77.5765	42.4362
AT4G13020	0	226.899	262.58	163.16		0	239.675	232.73	157.468
AT1G51200	51.7502	386.569	0	146.106		94.8025	529.947	0	208.25
AT5G15450	2.87501	16.8074	492.338	170.674		2.96258	2.66305	166.789	57.4717
AT4G24190	23.0001	151.266	309.47	161.245		130.353	404.784	659.4	398.179
AT1G54390	43.1251	231.101	187.557	153.928		118.503	159.783	174.547	150.944
AT1G58380	43.1251	226.899	187.557	152.527		20.738	119.837	81.4553	74.0102
AT3G02030	120.75	117.652	182.869	140.423		0	0	7.75765	2.58588
AT4G30310	69.0002	142.863	239.136	150.333		26.6632	197.066	267.639	163.789
AT5G63400	161.001	197.486	28.1336	128.874		183.68	191.74	100.849	158.756
AT1G78290	83.3753	218.496	131.29	144.387		53.3264	58.5871	108.607	73.5069
AT1G06460	161.001	222.697	0	127.899		106.653	135.816	0	80.8228
AT3G02040	123.625	117.652	178.18	139.819		0	0	3.87883	1.29294
AT3G01472	175.376	88.2386	126.601	130.072		121.466	47.9349	46.5459	71.9822
AT3G01470	175.376	88.2386	126.601	130.072		121.466	47.9349	46.5459	71.9822
AT5G19250	0	247.909	229.758	159.222		0	247.664	248.245	165.303
AT3G47500	129.375	155.468	121.912	135.585		74.0644	117.174	62.0612	84.4333
AT1G77930	255.876	79.835	0	111.904		159.979	34.6197	0	64.8663
AT3G59780	149.5	113.45	135.979	132.976		85.9147	87.8807	112.486	95.4271
AT4G26150	92.0003	54.6239	295.403	147.342		0	0	3.87883	1.29294
AT4G23670	218.501	134.459	0	117.653		183.68	122.5	0	102.06
AT2G40290	198.376	163.872	0	120.749		133.316	175.761	0	103.026
AT4G20980	146.625	138.661	112.534	132.607		79.9896	106.522	139.638	108.716
AT3G66654	43.1251	100.844	323.537	155.835		17.7755	103.859	162.911	94.8484
AT1G13560	132.25	151.266	121.912	135.143		136.279	266.305	147.395	183.326
AT5G06130	195.501	117.652	56.2672	123.14		106.653	47.9349	31.0306	61.8728
AT2G22720	155.25	138.661	98.4677	130.793		195.53	135.816	81.4553	137.6
AT1G21350	198.376	113.45	56.2672	122.698		88.8773	55.9241	23.273	56.0248
AT1G10522	169.626	205.89	0	125.172		35.5509	55.9241	0	30.4917
AT3G28070	138	113.45	154.735	135.395		35.5509	39.9458	23.273	32.9232
AT2G20230	115	155.468	145.357	138.608		130.353	210.381	159.032	166.589
AT1G11650	5.75002	0	497.027	167.592		41.4761	5.3261	349.094	131.965
AT4G32180	198.376	12.6055	168.802	126.594		186.642	10.6522	46.5459	81.2801
AT1G70160	184.001	84.0368	112.534	126.857		154.054	130.49	205.578	163.374
AT1G67860	207.001	4.20184	159.424	123.542		494.75	23.9675	345.215	287.978
AT1G68520	120.75	155.468	131.29	135.836		29.6258	47.9349	54.3036	43.9548
AT4G33030	112.125	159.67	140.668	137.488		14.8129	13.3153	38.7883	22.3055
AT4G02450	115	138.661	159.424	137.695		88.8773	90.5438	135.759	105.06
AT4G33630	71.8752	134.459	234.447	146.927		35.5509	63.9132	151.274	83.5795
AT2G31890	152.375	63.0276	182.869	132.757		204.418	151.794	283.154	213.122
AT3G26580	230.001	8.40368	117.223	118.543		124.428	0	96.9706	73.7996
AT5G37360	175.376	88.2386	117.223	126.946		103.69	55.9241	54.3036	71.3059
AT5G20500	129.375	96.6423	182.869	136.295		225.156	162.446	349.094	245.565
AT1G78020	172.501	193.285	0	121.928		385.135	612.502	0	332.546
AT4G05070	241.501	92.4405	0	111.314		162.942	50.598	0	71.1799
AT3G57610	43.1251	126.055	286.025	151.735		44.4387	53.261	89.213	62.3042
AT4G02520	163.876	134.459	79.7119	126.015		62.2141	69.2394	31.0306	54.1614
AT1G72430	140.875	197.486	46.8894	128.417		56.289	50.598	46.5459	51.1443
AT5G60400	89.1253	163.872	168.802	140.6		231.081	314.24	325.821	290.381
AT3G20060	166.751	201.688	0	122.813		118.503	149.131	0	89.2113
AT5G53160	155.25	134.459	93.7787	127.829		59.2515	69.2394	31.0306	53.1738
AT1G09140	86.2503	0	356.359	147.536		59.2515	0	186.184	81.8117
AT3G62530	181.126	4.20184	196.935	127.421		35.5509	0	58.1824	31.2444
AT4G31500	181.126	42.0184	154.735	125.96		68.1393	63.9132	104.728	78.9269
AT5G54770	37.3751	4.20184	431.382	157.653		8.88773	5.3261	403.398	139.204
AT5G43830	129.375	63.0276	215.691	136.031		254.782	143.805	387.883	262.156
AT1G29400	235.751	58.8258	46.8894	113.822		225.156	58.5871	69.8189	117.854
AT3G01390	201.251	151.266	0	117.506		219.231	181.088	0	133.439
AT5G49740	115	277.321	0	130.774		62.2141	106.522	0	56.2454
AT2G28290	132.25	75.6331	196.935	134.94		88.8773	55.9241	279.275	141.359
AT5G12140	247.251	79.835	0	109.029		417.723	279.62	0	232.448
AT3G26450	123.625	0	290.714	138.113		14.8129	0	15.5153	10.1094
AT2G26900	186.876	84.0368	93.7787	121.564		349.584	229.022	283.154	287.254
AT4G25880	77.6252	214.294	126.601	139.507		79.9896	175.761	128.001	127.917
AT5G06230	161.001	142.863	70.334	124.732		17.7755	53.261	15.5153	28.8506
AT1G02140	140.875	134.459	112.534	129.29		139.241	63.9132	116.365	106.506
AT2G20740	146.625	100.844	140.668	129.379		142.204	103.859	186.184	144.082
AT5G13440	189.751	155.468	9.37787	118.199		151.091	114.511	7.75765	91.1201
AT2G41110	146.625	117.652	121.912	128.73		139.241	77.2285	182.305	132.925
AT3G14690	138	184.881	60.9562	127.946		47.4012	34.6197	15.5153	32.5121
AT1G18210	86.2503	142.863	187.557	138.89		97.765	194.403	318.064	203.411
AT1G72710	129.375	79.835	187.557	132.256		53.3264	77.2285	112.486	81.0136
AT1G25260	138	100.844	150.046	129.63		97.765	37.2827	96.9706	77.3395
AT1G42550	135.125	100.844	154.735	130.235		41.4761	29.2936	31.0306	33.9334
AT3G23280	97.7503	126.055	187.557	137.121		53.3264	101.196	256.002	136.842
AT1G55000	198.376	33.6147	126.601	119.531		151.091	34.6197	93.0918	92.9343
AT3G12570	149.5	50.4221	187.557	129.16		284.407	149.131	232.73	222.089
AT5G14040	109.25	121.853	173.491	134.865		112.578	138.479	349.094	200.05
AT1G15280	143.75	8.40368	243.825	131.993		100.728	10.6522	93.0918	68.1572
AT1G28140	106.375	96.6423	206.313	136.444		74.0644	98.5329	135.759	102.785
AT2G01450	149.5	67.2294	168.802	128.511		260.707	170.435	248.245	226.462
AT5G21430	195.501	0	168.802	121.434		82.9521	0	54.3036	45.7519
AT4G20010	195.501	92.4405	65.6451	117.862		65.1767	15.9783	46.5459	42.567
AT3G11200	103.5	235.303	56.2672	131.69		124.428	239.675	58.1824	140.762
AT2G22980	207.001	134.459	0	113.82		177.755	117.174	0	98.3096
AT2G21530	57.5002	4.20184	389.182	150.295		23.7006	5.3261	135.759	54.9285
AT4G34230	235.751	25.211	75.023	111.995		1309.46	90.5438	806.796	735.599
AT3G11940	11.5	344.551	84.4008	146.817		0	426.088	31.0306	152.373
AT1G08550	149.5	151.266	75.023	125.263		53.3264	79.8916	77.5765	70.2648
AT5G10860	103.5	147.064	150.046	133.537		204.418	231.686	232.73	222.944
AT3G04790	201.251	71.4313	75.023	115.902		85.9147	29.2936	54.3036	56.504
AT4G15470	69.0002	193.285	154.735	139.007		180.717	503.317	325.821	336.618
AT1G14150	158.125	201.688	0	119.938		56.289	74.5655	0	43.6181
AT3G59970	132.25	226.899	14.0668	124.406		648.804	990.655	0	546.487
AT3G48200	120.75	58.8258	220.38	133.319		38.5135	29.2936	69.8189	45.8753
AT3G02360	63.2502	193.285	159.424	138.653		408.836	687.067	985.222	693.708
AT3G09440	181.126	163.872	0	114.999		151.091	231.686	0	127.592
AT4G09010	158.125	151.266	51.5783	120.323		168.867	125.163	46.5459	113.525
AT5G58420	135.125	46.2202	206.313	129.22		100.728	47.9349	73.6977	74.1201
AT5G06290	230.001	0	103.157	111.052		77.027	0	73.6977	50.2416
AT1G59700	115	105.046	173.491	131.179		44.4387	58.5871	23.273	42.0996
AT1G77760	166.751	50.4221	150.046	122.406		32.5883	13.3153	31.0306	25.6447
AT3G10860	195.501	142.863	0	112.788		260.707	191.74	0	150.815
AT3G52060	149.5	0	234.447	127.982		41.4761	10.6522	38.7883	30.3055
AT1G27370	83.3753	142.863	182.869	136.369		237.006	143.805	341.337	240.716
AT4G19880	189.751	151.266	0	113.672		71.1018	135.816	46.5459	84.4878
AT3G51880	0	100.844	365.737	155.527		0	29.2936	337.458	122.25
AT1G05320	103.5	75.6331	225.069	134.734		62.2141	175.761	302.548	180.175
AT5G45390	109.25	147.064	135.979	130.765		82.9521	87.8807	96.9706	89.2678
AT3G52340	258.751	50.4221	0	103.058		71.1018	15.9783	0	29.0267
AT3G13060	51.7502	67.2294	318.848	145.942		17.7755	117.174	248.245	127.732
AT3G12120	143.75	105.046	121.912	123.57		1125.78	977.34	892.13	998.416
AT1G14880	178.251	163.872	0	114.041		77.027	87.8807	0	54.9692
AT3G48740	278.876	0	18.7557	99.2105		17.7755	2.66305	0	6.81284
AT5G10470	94.8753	126.055	178.18	133.037		29.6258	47.9349	62.0612	46.5406
AT1G09970	54.6252	134.459	234.447	141.177		71.1018	159.783	162.911	131.265
AT2G15000	103.5	189.083	93.7787	128.787		44.4387	207.718	58.1824	103.446
AT3G16420	120.75	172.275	84.4008	125.809		0	7.98916	0	2.66305
AT5G13780	46.0001	210.092	164.113	140.068		68.1393	114.511	89.213	90.6212
AT3G11560	276.001	16.8074	4.68894	99.1657		109.615	7.98916	31.0306	49.545
AT5G20890	74.7502	155.468	178.18	136.133		50.3638	125.163	151.274	108.934
AT5G18670	69.0002	96.6423	253.203	139.615		8.88773	26.6305	54.3036	29.9406
AT5G08650	120.75	100.844	164.113	128.569		23.7006	29.2936	77.5765	43.5236
AT5G59613	166.751	176.477	0	114.409		186.642	319.566	0	168.736
AT2G31570	149.5	201.688	0	117.063		192.567	268.968	0	153.845
AT4G09650	2.87501	415.982	0	139.619		0	396.795	0	132.265
AT5G64770	146.625	151.266	60.9562	119.616		106.653	207.718	112.486	142.286
AT3G45030	120.75	243.707	0	121.486		50.3638	93.2068	0	47.8569
AT1G06190	40.2501	142.863	243.825	142.312		26.6632	63.9132	85.3342	58.6369
AT4G37190	11.5	386.569	18.7557	138.942		5.92515	170.435	15.5153	63.9586
AT5G23040	175.376	0	182.869	119.415		50.3638	0	62.0612	37.475
AT1G16460	172.501	151.266	18.7557	114.174		248.856	215.707	7.75765	157.44
AT3G51820	97.7503	0	309.47	135.74		35.5509	0	162.911	66.1539
AT1G20100	80.5003	151.266	168.802	133.523		23.7006	154.457	240.487	139.548
AT3G07810	97.7503	75.6331	225.069	132.817		159.979	138.479	566.309	288.255
AT4G26840	123.625	239.505	0	121.043		88.8773	194.403	0	94.4267
AT2G33800	270.251	4.20184	23.4447	99.2991		136.279	2.66305	3.87883	47.6068
AT5G15410	97.7503	142.863	150.046	130.22		65.1767	122.5	131.88	106.519
AT2G32870	97.7503	117.652	178.18	131.194		20.738	26.6305	19.3941	22.2542
AT3G24160	103.5	79.835	206.313	129.883		186.642	260.979	248.245	231.955
AT5G13510	189.751	138.661	0	109.47		74.0644	69.2394	0	47.7679
AT3G14600	152.375	75.6331	131.29	119.766		50.3638	58.5871	11.6365	40.1958
AT2G33740	74.7502	147.064	178.18	133.331		50.3638	53.261	155.153	86.2593
AT5G14780	204.126	117.652	0	107.259		186.642	130.49	0	105.711
AT4G30200	181.126	100.844	56.2672	112.746		133.316	151.794	46.5459	110.552
AT4G21560	172.501	100.844	70.334	114.56		62.2141	63.9132	174.547	100.225
AT4G23570	155.25	189.083	0	114.778		106.653	55.9241	0	54.1923
AT5G55220	169.626	0	187.557	119.061		32.5883	0	31.0306	21.2063
AT3G51920	281.751	4.20184	0	95.3176		198.493	13.3153	0	70.6026
AT2G33770	189.751	75.6331	70.334	111.906		325.883	111.848	108.607	182.113
AT2G35390	163.876	63.0276	126.601	117.835		71.1018	71.9024	93.0918	78.6987
AT1G10490	126.5	193.285	42.2004	120.662		53.3264	114.511	19.3941	62.4106
AT2G30620	126.5	151.266	84.4008	120.722		151.091	170.435	89.213	136.913
AT1G79850	281.751	0	0	93.917		136.279	0	0	45.4262
AT1G64500	204.126	113.45	0	105.858		11.8503	18.6414	19.3941	16.6286
AT1G47490	0	100.844	346.981	149.275		0	69.2394	193.941	87.7269
AT4G10100	138	201.688	9.37787	116.356		133.316	159.783	15.5153	102.871
AT1G29970	71.8752	138.661	187.557	132.698		53.3264	191.74	120.244	121.77
AT5G02610	109.25	130.257	135.979	125.162		77.027	37.2827	50.4247	54.9115
AT2G44060	86.2503	285.725	0	123.992		254.782	649.785	0	301.522
AT5G08060	74.7502	96.6423	229.758	133.717		74.0644	93.2068	159.032	108.768
AT4G39080	123.625	168.074	70.334	120.678		133.316	162.446	120.244	138.669
AT2G14560	146.625	184.881	14.0668	115.191		14.8129	5.3261	11.6365	10.5918
AT4G01940	129.375	100.844	135.979	122.066		74.0644	66.5763	46.5459	62.3955
AT1G73030	166.751	155.468	14.0668	112.095		272.557	175.761	19.3941	155.904
AT1G66240	278.876	0	4.68894	94.5216		328.846	2.66305	3.87883	111.796
AT4G00830	132.25	42.0184	196.935	123.735		23.7006	58.5871	38.7883	40.3587
AT1G67900	126.5	117.652	121.912	122.021		112.578	74.5655	116.365	101.169
AT5G57870	172.501	67.2294	103.157	114.296		136.279	53.261	131.88	107.14
AT1G48598	201.251	4.20184	126.601	110.685		97.765	0	58.1824	51.9825
AT4G08980	230.001	75.6331	0	101.878		260.707	106.522	329.7	232.31
AT2G27720	278.876	4.20184	0	94.3592		239.969	0	0	79.9896
AT2G24280	63.2502	75.6331	271.958	136.947		17.7755	29.2936	100.849	49.3062
AT1G29250	89.1253	37.8166	271.958	132.967		26.6632	45.2719	186.184	86.0396
AT1G12110	155.25	134.459	56.2672	115.326		17.7755	15.9783	7.75765	13.8371
AT1G07440	178.251	0	168.802	115.684		88.8773	5.3261	147.395	80.5329
AT3G08690	66.1252	138.661	192.246	132.344		41.4761	45.2719	96.9706	61.2395
AT3G21890	89.1253	33.6147	271.958	131.566		23.7006	26.6305	85.3342	45.2218
AT1G22780	178.251	0	164.113	114.121		85.9147	0	96.9706	60.9618
AT5G41790	123.625	176.477	56.2672	118.79		29.6258	69.2394	23.273	40.7127
AT3G59920	77.6252	4.20184	323.537	135.121		245.894	15.9783	616.733	292.868
AT3G55240	120.75	126.055	117.223	121.343		14.8129	18.6414	34.9094	22.7879
AT3G03890	166.751	75.6331	98.4677	113.617		62.2141	39.9458	19.3941	40.518
AT2G27030	8.62503	197.486	220.38	142.164		8.88773	575.219	857.22	480.442
AT1G73885	0	403.377	4.68894	136.022		0	149.131	0	49.7103
AT1G33050	115	63.0276	196.935	124.988		103.69	79.8916	81.4553	88.3457
AT1G67865	276.001	0	0	92.0003		2144.91	0	0	714.969
AT5G62790	109.25	176.477	75.023	120.25		74.0644	71.9024	31.0306	58.9991
AT2G21960	89.1253	0	304.781	131.302		29.6258	0	128.001	52.5423
AT3G54440	132.25	109.248	112.534	118.011		59.2515	101.196	100.849	87.099
AT4G00165	115	151.266	93.7787	120.015		47.4012	101.196	69.8189	72.8054
AT5G03900	138	159.67	46.8894	114.853		100.728	47.9349	46.5459	65.0695
AT4G39540	166.751	42.0184	131.29	113.353		88.8773	58.5871	69.8189	72.4278
AT5G50430	112.125	12.6055	253.203	125.978		106.653	127.826	209.457	147.979
AT5G49970	143.75	0	215.691	119.814		142.204	0	201.699	114.634
AT2G44350	184.001	126.055	9.37787	106.478		260.707	127.826	0	129.511
AT4G02080	80.5003	75.6331	234.447	130.193		115.54	191.74	465.459	257.58
AT3G26280	169.626	151.266	4.68894	108.527		11.8503	10.6522	3.87883	8.79378
AT3G08650	155.25	67.2294	121.912	114.797		213.306	143.805	186.184	181.098
AT1G19910	244.376	0	51.5783	98.6514		515.488	0	108.607	208.032
AT3G13870	143.75	134.459	65.6451	114.618		177.755	372.827	240.487	263.69
AT1G68830	117.875	159.67	79.7119	119.086		139.241	74.5655	54.3036	89.37
AT4G01070	89.1253	134.459	150.046	124.543		177.755	154.457	166.789	166.334
AT4G20150	146.625	138.661	51.5783	112.288		162.942	226.359	100.849	163.384
AT2G36835	135.125	109.248	103.157	115.843		23.7006	50.598	38.7883	37.6956
AT1G12240	166.751	155.468	0	107.406		118.503	133.153	0	83.8852
AT3G55330	117.875	142.863	93.7787	118.172		35.5509	85.2177	85.3342	68.7009
AT1G08640	138	197.486	0	111.829		56.289	58.5871	0	38.292
AT2G30870	92.0003	126.055	150.046	122.7		435.499	439.404	616.733	497.212
AT2G40000	106.375	168.074	79.7119	118.054		118.503	316.903	178.426	204.611
AT3G52960	120.75	138.661	89.0898	116.167		133.316	141.142	96.9706	123.809
AT2G44670	0	205.89	211.002	138.964		0	119.837	248.245	122.694
AT2G44100	69.0002	109.248	206.313	128.187		118.503	287.61	333.579	246.564
AT5G60640	103.5	109.248	150.046	120.931		177.755	245.001	170.668	197.808
AT3G23940	92.0003	126.055	150.046	122.7		26.6632	26.6305	7.75765	20.3505
AT5G49510	126.5	92.4405	131.29	116.744		142.204	69.2394	116.365	109.269
AT1G09240	92.0003	130.257	145.357	122.538		5.92515	13.3153	3.87883	7.70641
AT4G31720	97.7503	75.6331	196.935	123.44		94.8025	69.2394	116.365	93.4689
AT1G43190	115	151.266	84.4008	116.889		118.503	103.859	93.0918	105.151
AT5G53490	17.2501	176.477	215.691	136.473		29.6258	95.8699	248.245	124.58
AT4G27600	112.125	100.844	145.357	119.442		65.1767	58.5871	42.6671	55.477
AT5G35620	161.001	84.0368	84.4008	109.813		106.653	74.5655	108.607	96.6084
AT2G14720	143.75	0	206.313	116.688		219.231	0	201.699	140.31
AT3G09770	161.001	126.055	37.5115	108.189		219.231	186.414	155.153	186.932
AT2G20860	129.375	105.046	112.534	115.652		68.1393	85.2177	85.3342	79.5637
AT3G11410	140.875	67.2294	135.979	114.695		59.2515	58.5871	139.638	85.8255
AT1G80070	100.625	109.248	154.735	121.536		82.9521	71.9024	65.94	73.5982
AT5G59910	54.6252	210.092	112.534	125.751		151.091	279.62	186.184	205.632
AT4G10300	158.125	159.67	0	105.932		148.129	133.153	0	93.7605
AT1G72645	155.25	79.835	93.7787	109.621		65.1767	23.9675	31.0306	40.0583
AT5G06510	51.7502	100.844	239.136	130.577		142.204	159.783	407.277	236.421
AT1G76030	103.5	105.046	150.046	119.531		127.391	127.826	352.973	202.73
AT1G02840	8.62503	378.166	0	128.93		23.7006	300.925	0	108.208
AT1G53570	103.5	189.083	56.2672	116.283		44.4387	71.9024	81.4553	65.9321
AT4G37760	138	189.083	0	109.028		77.027	111.848	0	62.9584
AT1G48350	224.251	63.0276	0	95.7594		91.8399	55.9241	0	49.2547
AT5G19860	74.7502	92.4405	211.002	126.064		26.6632	34.6197	112.486	57.9229
AT5G61820	215.626	0	84.4008	100.009		44.4387	0	38.7883	27.7423
AT2G02760	129.375	0	225.069	118.148		165.904	0	461.58	209.162
AT5G53580	140.875	42.0184	159.424	114.106		53.3264	10.6522	15.5153	26.498
AT2G35680	94.8753	134.459	131.29	120.208		94.8025	146.468	124.122	121.798
AT4G28910	146.625	176.477	0	107.701		186.642	287.61	34.9094	169.72
AT4G24820	46.0001	126.055	220.38	130.812		112.578	276.957	252.124	213.886
AT1G09210	83.3753	67.2294	225.069	125.225		127.391	77.2285	314.185	172.935
AT5G61770	163.876	151.266	0	105.047		35.5509	79.8916	0	38.4808
AT5G54110	43.1251	105.046	248.514	132.228		20.738	74.5655	65.94	53.7478
AT5G01750	14.375	361.358	9.37787	128.37		8.88773	266.305	0	91.731
AT4G32770	92.0003	96.6423	178.18	122.274		59.2515	15.9783	54.3036	43.1778
AT3G10260	103.5	88.2386	168.802	120.18		142.204	63.9132	186.184	130.767
AT3G05060	80.5003	75.6331	220.38	125.504		11.8503	5.3261	89.213	35.4631
AT2G37240	14.375	147.064	248.514	136.651		0	58.5871	58.1824	38.9232
AT5G59320	120.75	0	234.447	118.399		3223.28	0	5267.45	2830.24
AT1G01470	112.125	138.661	93.7787	114.855		239.969	359.512	290.912	296.798
AT1G33140	0	386.569	0	128.856		0	215.707	0	71.9024
AT2G44490	92.0003	96.6423	173.491	120.711		77.027	45.2719	77.5765	66.6251
AT5G64580	97.7503	54.6239	211.002	121.125		38.5135	18.6414	116.365	57.8399
AT2G21250	166.751	142.863	0	103.204		302.183	218.37	0	173.518
AT5G62810	100.625	142.863	107.846	117.111		47.4012	42.6088	27.1518	39.0539
AT5G59730	138	100.844	93.7787	110.874		136.279	111.848	93.0918	113.74
AT1G80180	149.5	134.459	37.5115	107.157		50.3638	31.9566	0	27.4401
AT1G02150	103.5	58.8258	196.935	119.754		29.6258	10.6522	58.1824	32.8201
AT4G04040	89.1253	88.2386	187.557	121.64		26.6632	26.6305	31.0306	28.1081
AT3G19010	86.2503	134.459	140.668	120.459		130.353	117.174	116.365	121.297
AT5G20950	51.7502	67.2294	271.958	130.313		88.8773	47.9349	186.184	107.665
AT5G23120	184.001	117.652	0	100.551		20.738	71.9024	0	30.8801
AT4G12790	138	100.844	93.7787	110.874		118.503	149.131	217.214	161.616
AT5G03345	80.5003	176.477	103.157	120.045		112.578	213.044	201.699	175.774
AT5G11500	143.75	126.055	56.2672	108.691		79.9896	66.5763	31.0306	59.1988
AT2G18740	69.0002	105.046	201.624	125.223		53.3264	66.5763	108.607	76.1699
AT5G47435	74.7502	67.2294	234.447	125.475		41.4761	31.9566	155.153	76.1952
AT5G39830	178.251	100.844	28.1336	102.409		112.578	74.5655	46.5459	77.8964
AT1G12140	161.001	151.266	0	104.089		82.9521	79.8916	46.5459	69.7965
AT5G23750	132.25	142.863	56.2672	110.46		296.258	234.349	131.88	220.829
AT3G17860	86.2503	163.872	107.846	119.323		97.765	45.2719	46.5459	63.1943
AT2G11890	92.0003	84.0368	187.557	121.198		29.6258	15.9783	93.0918	46.232
AT5G56150	201.251	84.0368	9.37787	98.2218		231.081	79.8916	0	103.658
AT3G26100	103.5	100.844	150.046	118.13		159.979	175.761	186.184	173.975
AT3G03250	117.875	130.257	93.7787	113.97		293.295	250.327	275.397	273.006
AT1G29700	77.6252	109.248	182.869	123.247		79.9896	39.9458	89.213	69.7161
AT1G06130	120.75	67.2294	159.424	115.801		71.1018	63.9132	100.849	78.6215
AT4G39730	126.5	92.4405	117.223	112.055		145.166	109.185	120.244	124.865
AT3G02020	92.0003	0	276.647	122.883		316.996	5.3261	550.793	291.038
AT1G76570	138	180.679	0	106.227		23.7006	47.9349	0	23.8785
AT1G07610	166.751	138.661	0	101.804		2.96258	2.66305	0	1.87521
AT5G66120	8.62503	168.074	225.069	133.923		0	157.12	294.791	150.637
AT1G10500	126.5	197.486	0	107.996		53.3264	119.837	0	57.7212
AT5G40810	163.876	105.046	42.2004	103.707		82.9521	114.511	38.7883	78.7505
AT4G22240	0	159.67	243.825	134.498		2.96258	234.349	182.305	139.872
AT2G33370	0	210.092	187.557	132.55		0	133.153	93.0918	75.4148
AT3G56140	106.375	71.4313	168.802	115.536		32.5883	23.9675	69.8189	42.1249
AT2G01110	163.876	21.0092	131.29	105.392		44.4387	21.3044	42.6671	36.1367
AT3G51870	97.7503	58.8258	196.935	117.837		5.92515	10.6522	23.273	13.2834
AT4G04293	132.25	96.6423	98.4677	109.12		8.88773	10.6522	7.75765	9.0992
AT2G05220	0	0	422.004	140.668		0	0	294.791	98.2636
AT3G56070	97.7503	117.652	131.29	115.564		77.027	47.9349	38.7883	54.5834
AT1G75350	120.75	197.486	4.68894	107.642		85.9147	93.2068	0	59.7072
AT3G48500	143.75	100.844	75.023	106.539		29.6258	31.9566	23.273	28.2851
AT4G01915	181.126	113.45	0	98.1917		53.3264	31.9566	0	28.4277
AT4G32520	120.75	58.8258	159.424	113		35.5509	63.9132	69.8189	56.4277
AT5G65840	138	134.459	46.8894	106.45		44.4387	45.2719	34.9094	41.54
AT1G80040	166.751	50.4221	93.7787	103.65		124.428	79.8916	69.8189	91.3795
AT2G35010	138	33.6147	159.424	110.346		88.8773	58.5871	116.365	87.9431
AT2G16430	201.251	84.0368	0	95.0958		35.5509	26.6305	0	20.7271
AT2G26980	57.5002	147.064	164.113	122.892		103.69	53.261	116.365	91.1053
AT4G39140	143.75	0	187.557	110.436		103.69	0	58.1824	53.9575
AT3G19720	149.5	0	178.18	109.227		47.4012	0	85.3342	44.2451
AT1G70660	132.25	71.4313	126.601	110.094		97.765	85.2177	104.728	95.9037
AT3G23700	109.25	84.0368	150.046	114.444		23.7006	23.9675	42.6671	30.1117
AT5G26360	46.0001	84.0368	253.203	127.746		38.5135	103.859	302.548	148.307
AT4G31860	80.5003	176.477	93.7787	116.919		82.9521	79.8916	93.0918	85.3118
AT4G26700	25.8751	252.11	98.4677	125.484		44.4387	191.74	116.365	117.514
AT4G04620	120.75	134.459	75.023	110.077		100.728	186.414	62.0612	116.401
AT2G36160	258.751	0	0	86.2503		148.129	2.66305	0	50.264
AT2G01850	97.7503	109.248	140.668	115.889		32.5883	26.6305	50.4247	36.5479
AT1G56700	172.501	126.055	0	99.5186		239.969	135.816	0	125.261
AT3G45640	106.375	4.20184	239.136	116.571		234.044	34.6197	581.824	283.496
AT1G74230	109.25	96.6423	131.29	112.394		106.653	53.261	128.001	95.9717
AT1G15120	172.501	121.853	0	98.118		316.996	218.37	0	178.455
AT3G09600	184.001	54.6239	56.2672	98.2972		53.3264	5.3261	11.6365	23.4297
AT4G19710	89.1253	151.266	103.157	114.516		26.6632	47.9349	19.3941	31.3308
AT5G40770	83.3753	105.046	164.113	117.511		53.3264	53.261	128.001	78.1962
AT2G21320	89.1253	180.679	70.334	113.379		8.88773	45.2719	3.87883	19.3461
AT1G14980	204.126	46.2202	32.8226	94.3895		94.8025	93.2068	19.3941	69.1345
AT2G26250	63.2502	105.046	196.935	121.744		56.289	82.5546	162.911	100.585
AT5G13190	71.8752	201.688	75.023	116.195		68.1393	226.359	100.849	131.783
AT3G24420	123.625	193.285	0	105.637		32.5883	26.6305	0	19.7396
AT2G35820	155.25	67.2294	89.0898	103.857		157.017	98.5329	77.5765	111.042
AT2G27680	195.501	88.2386	0	94.5797		65.1767	74.5655	0	46.5807
AT1G79380	146.625	105.046	60.9562	104.209		124.428	85.2177	15.5153	75.0537
AT1G21080	109.25	96.6423	126.601	110.831		85.9147	93.2068	131.88	103.667
AT4G25030	109.25	142.863	75.023	109.045		242.931	239.675	294.791	259.132
AT4G37000	94.8753	79.835	168.802	114.504		71.1018	77.2285	81.4553	76.5952
AT4G14270	86.2503	50.4221	215.691	117.454		130.353	202.392	333.579	222.108
AT1G35420	100.625	75.6331	164.113	113.457		32.5883	58.5871	96.9706	62.7154
AT3G01340	40.2501	84.0368	253.203	125.83		154.054	111.848	418.913	228.272
AT5G64140	143.75	0	178.18	107.31		59.2515	0	120.244	59.8317
AT5G11200	97.7503	0	253.203	116.984		77.027	0	73.6977	50.2416
AT5G12040	132.25	168.074	9.37787	103.234		177.755	250.327	7.75765	145.28
AT4G36195	109.25	100.844	121.912	110.669		130.353	282.284	100.849	171.162
AT1G71950	57.5002	46.2202	267.269	123.663		106.653	101.196	527.52	245.123
AT2G38800	89.1253	75.6331	182.869	115.876		168.867	165.109	465.459	266.478
AT2G37130	138	100.844	75.023	104.623		154.054	10.6522	69.8189	78.175
AT5G61010	126.5	109.248	84.4008	106.716		53.3264	37.2827	38.7883	43.1325
AT1G05300	126.5	0	206.313	110.938		41.4761	5.3261	62.0612	36.2878
AT3G15810	57.5002	113.45	192.246	121.065		53.3264	71.9024	112.486	79.2382
AT5G53860	146.625	155.468	0	100.698		82.9521	109.185	0	64.0458
AT2G31040	135.125	33.6147	154.735	107.825		133.316	31.9566	112.486	92.5862
AT1G55350	103.5	168.074	56.2672	109.28		142.204	117.174	46.5459	101.975
AT3G04730	143.75	159.67	0	101.14		177.755	245.001	7.75765	143.504
AT5G28770	80.5003	151.266	112.534	114.767		53.3264	119.837	34.9094	69.3577
AT4G34000	115	126.055	84.4008	108.485		26.6632	103.859	58.1824	62.9015
AT4G24220	126.5	117.652	75.023	106.392		355.509	420.762	186.184	320.818
AT4G21160	103.5	201.688	18.7557	107.981		106.653	149.131	46.5459	100.777
AT3G27090	0	100.844	300.092	133.645		0	101.196	205.578	102.258
AT3G06720	132.25	67.2294	121.912	107.131		112.578	106.522	77.5765	98.8922
AT3G02080	92.0003	231.101	4.68894	109.263		62.2141	154.457	0	72.2237
AT2G26800	140.875	163.872	0	101.582		260.707	311.577	0	190.761
AT1G72770	115	126.055	84.4008	108.485		65.1767	15.9783	54.3036	45.1529
AT5G09920	86.2503	159.67	89.0898	111.67		91.8399	63.9132	58.1824	71.3118
AT4G36810	94.8753	58.8258	187.557	113.753		47.4012	58.5871	120.244	75.4107
AT1G10370	103.5	58.8258	173.491	111.939		17.7755	39.9458	46.5459	34.7557
AT1G72830	112.125	63.0276	154.735	109.963		115.54	151.794	232.73	166.688
AT5G17560	112.125	88.2386	126.601	108.988		44.4387	53.261	147.395	81.6984
AT1G35340	0	189.083	196.935	128.673		0	191.74	69.8189	87.1862
AT4G23400	109.25	84.0368	135.979	109.755		719.906	945.383	1322.68	995.99
AT3G47960	106.375	201.688	9.37787	105.814		189.605	141.142	11.6365	114.128
AT3G55170	172.501	92.4405	23.4447	96.1286		106.653	53.261	15.5153	58.4764
AT3G28940	143.75	155.468	0	99.7395		103.69	149.131	0	84.2737
AT1G63800	117.875	113.45	89.0898	106.805		97.765	74.5655	93.0918	88.4741
AT5G67370	135.125	147.064	23.4447	101.878		8.88773	47.9349	3.87883	20.2338
AT3G24190	201.251	0	79.7119	93.6542		65.1767	0	3.87883	23.0185
AT3G02750	189.751	0	98.4677	96.0727		222.193	5.3261	116.365	114.628
AT2G04700	241.501	12.6055	0	84.7021		130.353	0	0	43.4511
AT1G19570	0	361.358	0	120.453		5.92515	1315.55	0	440.491
AT5G66040	247.251	0	0	82.4169		1143.55	0	0	381.185
AT1G07080	132.25	0	187.557	106.603		171.829	0	143.517	105.115
AT4G27030	106.375	96.6423	121.912	108.31		85.9147	58.5871	19.3941	54.632
AT4G31985	247.251	0	0	82.4169		151.091	0	0	50.3638
AT4G02510	172.501	105.046	4.68894	94.0785		77.027	61.2502	0	46.0924
AT5G57660	209.876	29.4129	28.1336	89.1407		71.1018	0	0	23.7006
AT1G13245	146.625	147.064	0	97.8966		11.8503	10.6522	0	7.50084
AT1G05850	71.8752	71.4313	206.313	116.54		1196.88	1653.76	3362.94	2071.19
AT2G35810	138	88.2386	79.7119	101.984		142.204	127.826	112.486	127.505
AT2G35660	0	96.6423	295.403	130.682		0	42.6088	46.5459	29.7182
AT1G64355	115	75.6331	131.29	107.308		106.653	85.2177	162.911	118.26
AT3G11280	86.2503	84.0368	168.802	113.03		41.4761	95.8699	93.0918	76.8126
AT4G31180	155.25	92.4405	46.8894	98.1934		154.054	69.2394	23.273	82.1888
AT3G08510	184.001	58.8258	37.5115	93.4459		325.883	319.566	356.852	334.101
AT3G56310	149.5	142.863	0	97.4543		82.9521	159.783	0	80.9118
AT1G32540	25.8751	126.055	220.38	124.103		20.738	183.751	217.214	140.568
AT1G48830	0	361.358	0	120.453		17.7755	218.37	0	78.7152
AT5G34850	138	113.45	51.5783	101.009		136.279	173.098	81.4553	130.277
AT3G51950	46.0001	25.211	300.092	123.768		82.9521	74.5655	349.094	168.871
AT3G19450	143.75	151.266	0	98.3389		94.8025	122.5	23.273	80.1919
AT2G01670	129.375	172.275	0	100.55		32.5883	47.9349	0	26.8411
AT4G02725	97.7503	210.092	9.37787	105.74		47.4012	69.2394	3.87883	40.1731
AT4G02480	149.5	88.2386	60.9562	99.5651		115.54	69.2394	54.3036	79.6945
AT3G19170	5.75002	180.679	192.246	126.225		0	47.9349	77.5765	41.8371
AT2G26340	140.875	42.0184	126.601	103.165		118.503	50.598	73.6977	80.9329
AT4G34630	163.876	96.6423	23.4447	94.6542		157.017	125.163	0	94.06
AT5G11090	106.375	54.6239	164.113	108.371		53.3264	39.9458	120.244	71.1719
AT3G61210	115	105.046	93.7787	104.608		38.5135	79.8916	50.4247	56.2766
AT5G67510	77.6252	105.046	154.735	112.469		47.4012	58.5871	58.1824	54.7236
AT2G32240	163.876	75.6331	46.8894	95.466		94.8025	138.479	166.789	133.357
AT3G01120	17.2501	189.083	159.424	121.919		8.88773	324.892	224.972	186.251
AT1G47420	51.7502	100.844	201.624	118.073		85.9147	173.098	155.153	138.055
AT5G55190	140.875	151.266	0	97.3806		106.653	93.2068	0	66.6199
AT3G46210	86.2503	0	257.891	114.714		29.6258	53.261	174.547	85.8113
AT3G26180	11.5	340.349	0	117.283		5.92515	122.5	0	42.8085
AT5G40670	60.3752	155.468	126.601	114.148		32.5883	85.2177	65.94	61.2487
AT4G16370	235.751	8.40368	4.68894	82.9478		159.979	2.66305	3.87883	55.507
AT3G22370	166.751	109.248	4.68894	93.5624		38.5135	42.6088	3.87883	28.3337
AT3G18680	51.7502	88.2386	215.691	118.56		41.4761	21.3044	27.1518	29.9774
AT5G13430	149.5	75.6331	70.334	98.4892		154.054	71.9024	81.4553	102.471
AT1G72450	28.7501	79.835	262.58	123.722		94.8025	141.142	426.671	220.872
AT5G47030	117.875	180.679	0	99.5182		159.979	258.316	0	139.432
AT3G61580	112.125	117.652	79.7119	103.163		165.904	138.479	65.94	123.441
AT3G07390	77.6252	54.6239	206.313	112.854		130.353	55.9241	166.789	117.689
AT1G18720	92.0003	218.496	0	103.499		53.3264	223.696	0	92.3409
AT4G33250	132.25	0	178.18	103.477		124.428	0	151.274	91.9008
AT4G12720	103.5	100.844	112.534	105.626		284.407	359.512	593.46	412.46
AT3G10060	69.0002	138.661	126.601	111.421		53.3264	106.522	46.5459	68.7981
AT4G26630	34.5001	176.477	140.668	117.215		23.7006	191.74	155.153	123.531
AT2G36895	132.25	84.0368	84.4008	100.229		100.728	101.196	100.849	100.924
AT3G21560	86.2503	75.6331	168.802	110.228		0	0	19.3941	6.46471
AT4G03200	138	142.863	9.37787	96.7469		53.3264	101.196	31.0306	61.851
AT4G25570	126.5	168.074	0	98.1913		91.8399	255.653	0	115.831
AT5G42520	172.501	100.844	0	91.1149		177.755	71.9024	0	83.219
AT1G04300	94.8753	88.2386	140.668	107.927		88.8773	87.8807	128.001	101.586
AT2G47640	69.0002	252.11	0	107.037		106.653	234.349	0	113.667
AT2G02390	0	252.11	112.534	121.548		0	143.805	34.9094	59.5714
AT2G48100	34.5001	50.4221	281.336	122.086		47.4012	31.9566	155.153	78.1703
AT5G47880	80.5003	50.4221	206.313	112.412		94.8025	63.9132	170.668	109.795
AT5G61960	40.2501	142.863	168.802	117.305		41.4761	69.2394	124.122	78.2793
AT1G29470	103.5	176.477	28.1336	102.704		645.842	505.98	46.5459	399.456
AT4G01800	5.75002	92.4405	281.336	126.509		5.92515	18.6414	112.486	45.6842
AT3G51370	126.5	117.652	56.2672	100.14		165.904	122.5	77.5765	121.994
AT5G64250	109.25	33.6147	178.18	107.015		142.204	42.6088	186.184	123.665
AT5G46020	106.375	121.853	84.4008	104.21		74.0644	61.2502	81.4553	72.2566
AT1G50200	132.25	88.2386	79.7119	100.067		88.8773	61.2502	77.5765	75.9013
AT1G19400	241.501	0	0	80.5003		100.728	0	0	33.5759
AT4G34100	28.7501	302.532	9.37787	113.553		5.92515	255.653	7.75765	89.7786
AT3G46000	74.7502	168.074	84.4008	109.075		281.445	223.696	174.547	226.563
AT3G10090	86.2503	37.8166	211.002	111.69		26.6632	53.261	178.426	86.1167
AT2G36620	2.87501	344.551	4.68894	117.372		0	109.185	0	36.395
AT1G55960	83.3753	84.0368	164.113	110.508		32.5883	34.6197	65.94	44.3827
AT2G37710	158.125	67.2294	56.2672	93.8741		68.1393	85.2177	38.7883	64.0484
AT3G56010	149.5	79.835	56.2672	95.2009		56.289	50.598	23.273	43.3866
AT2G41680	161.001	113.45	0	91.4834		32.5883	39.9458	0	24.178
AT5G08760	0	260.514	98.4677	119.661		0	157.12	77.5765	78.2322
AT1G60870	112.125	109.248	84.4008	101.925		94.8025	66.5763	93.0918	84.8235
AT3G19000	71.8752	168.074	84.4008	108.117		38.5135	74.5655	62.0612	58.3801
AT3G28050	146.625	16.8074	131.29	98.241		103.69	58.5871	100.849	87.7089
AT3G57450	117.875	54.6239	131.29	101.263		479.937	375.49	927.039	594.156
AT5G01350	163.876	105.046	0	89.6405		195.53	151.794	0	115.775
AT4G37470	63.2502	54.6239	220.38	112.751		29.6258	61.2502	259.881	116.919
AT5G56030	20.1251	315.138	0	111.754		8.88773	191.74	0	66.8758
AT4G24960	115	0	196.935	103.979		201.455	2.66305	512.005	238.708
AT3G56200	92.0003	147.064	70.334	103.133		29.6258	66.5763	34.9094	43.7038
AT2G47730	140.875	88.2386	56.2672	95.1271		20.738	42.6088	50.4247	37.9239
AT1G51805	23.0001	138.661	192.246	117.969		0	61.2502	54.3036	38.5179
AT5G61420	132.25	100.844	56.2672	96.4539		124.428	154.457	93.0918	123.992
AT1G13080	155.25	50.4221	75.023	93.5652		118.503	85.2177	69.8189	91.1799
AT1G79050	115	176.477	0	97.1592		47.4012	74.5655	0	40.6556
AT5G38660	138	92.4405	56.2672	95.5694		79.9896	61.2502	23.273	54.8376
AT5G38510	109.25	184.881	0	98.0438		47.4012	42.6088	0	30.0034
AT5G58240	103.5	42.0184	168.802	104.773		94.8025	21.3044	116.365	77.4905
AT5G20180	109.25	50.4221	150.046	103.239		88.8773	63.9132	124.122	92.3043
AT5G17310	120.75	67.2294	112.534	100.171		71.1018	21.3044	31.0306	41.1456
AT3G54660	17.2501	302.532	18.7557	112.846		26.6632	95.8699	19.3941	47.3091
AT4G14410	132.25	109.248	46.8894	96.1292		159.979	111.848	31.0306	100.953
AT1G20260	132.25	0	168.802	100.351		228.118	0	325.821	184.647
AT1G16470	11.5	151.266	196.935	119.901		29.6258	202.392	217.214	149.744
AT3G21690	80.5003	159.67	75.023	105.064		26.6632	63.9132	31.0306	40.5357
AT5G58290	129.375	75.6331	89.0898	98.0328		154.054	162.446	128.001	148.167
AT5G48150	80.5003	126.055	112.534	106.363		225.156	268.968	256.002	250.042
AT1G29050	100.625	42.0184	173.491	105.378		346.621	314.24	764.129	474.997
AT5G22340	80.5003	117.652	121.912	106.688		5.92515	26.6305	7.75765	13.4378
AT5G16620	83.3753	159.67	70.334	104.46		44.4387	79.8916	46.5459	56.9587
AT4G37550	149.5	0	140.668	96.7228		71.1018	5.3261	116.365	64.2642
AT2G21160	172.501	75.6331	18.7557	88.9631		272.557	53.261	73.6977	133.172
AT2G20580	97.7503	100.844	112.534	103.71		65.1767	69.2394	108.607	81.0077
AT2G16950	74.7502	58.8258	196.935	110.17		106.653	74.5655	131.88	104.366
AT3G23000	172.501	21.0092	75.023	89.5109		361.434	149.131	407.277	305.947
AT2G44620	80.5003	88.2386	150.046	106.262		94.8025	122.5	178.426	131.91
AT2G24090	71.8752	201.688	37.5115	103.692		38.5135	71.9024	11.6365	40.6841
AT1G32990	224.251	12.6055	0	78.9521		59.2515	13.3153	0	24.1889
AT1G23490	80.5003	117.652	117.223	105.125		260.707	292.936	302.548	285.397
AT1G21310	138	138.661	0	92.2204		14.8129	15.9783	0	10.2637
AT5G15845	109.25	117.652	70.334	99.0786		8.88773	21.3044	11.6365	13.9429
AT2G02710	155.25	100.844	14.0668	90.0538		79.9896	47.9349	11.6365	46.5203
AT1G31910	92.0003	92.4405	126.601	103.681		79.9896	90.5438	120.244	96.9256
AT5G59160	163.876	75.6331	28.1336	89.2141		248.856	175.761	0	141.539
AT3G11670	89.1253	180.679	32.8226	100.876		35.5509	37.2827	31.0306	34.6214
AT5G66210	97.7503	105.046	103.157	101.984		115.54	119.837	170.668	135.349
AT5G13030	83.3753	33.6147	206.313	107.768		41.4761	13.3153	147.395	67.3956
AT4G23430	207.001	0	42.2004	83.067		195.53	0	34.9094	76.8132
AT3G12390	158.125	75.6331	37.5115	90.4234		85.9147	47.9349	73.6977	69.1824
AT2G18750	97.7503	29.4129	187.557	104.907		142.204	53.261	201.699	132.388
AT1G76010	186.876	67.2294	0	84.7017		74.0644	39.9458	0	38.0034
AT1G15290	60.3752	151.266	112.534	108.059		47.4012	61.2502	89.213	65.9548
AT4G11010	86.2503	79.835	145.357	103.814		189.605	191.74	217.214	199.52
AT4G01790	0	88.2386	276.647	121.629		0	18.6414	112.486	43.7091
AT5G25560	34.5001	100.844	206.313	113.886		71.1018	133.153	287.033	163.763
AT5G03910	109.25	71.4313	117.223	99.3017		38.5135	23.9675	50.4247	37.6352
AT4G33666	8.62503	4.20184	356.359	123.062		2.96258	0	69.8189	24.2605
AT3G02260	112.125	92.4405	89.0898	97.8852		53.3264	103.859	81.4553	79.5469
AT1G19715	120.75	25.211	150.046	98.6691		88.8773	21.3044	108.607	72.9296
AT3G61220	2.87501	134.459	220.38	119.238		0	39.9458	85.3342	41.76
AT3G09820	86.2503	109.248	112.534	102.678		260.707	681.741	504.247	482.232
AT1G04550	138	117.652	18.7557	91.4692		100.728	127.826	77.5765	102.044
AT2G38880	155.25	109.248	0	88.1661		154.054	143.805	0	99.2863
AT1G79790	63.2502	109.248	150.046	107.515		59.2515	71.9024	62.0612	64.405
AT1G63010	103.5	67.2294	131.29	100.673		189.605	85.2177	77.5765	117.466
AT2G46680	120.75	126.055	37.5115	94.7724		65.1767	26.6305	23.273	38.3601
AT5G64570	152.375	84.0368	32.8226	89.7449		177.755	119.837	7.75765	101.783
AT5G01600	152.375	8.40368	117.223	92.6675		192.567	2.66305	159.032	118.087
AT4G36800	138	130.257	4.68894	90.9821		165.904	173.098	7.75765	115.587
AT2G47970	138	33.6147	112.534	94.7165		112.578	29.2936	162.911	101.594
AT2G17390	135.125	71.4313	75.023	93.8599		112.578	151.794	54.3036	106.225
AT5G05170	69.0002	29.4129	229.758	109.39		574.74	215.707	1233.47	674.638
AT4G27000	172.501	84.0368	0	85.5124		192.567	141.142	0	111.236
AT3G55610	132.25	134.459	9.37787	92.0291		50.3638	45.2719	7.75765	34.4644
AT3G06080	120.75	159.67	0	93.4734		5.92515	74.5655	0	26.8302
AT1G36320	2.87501	117.652	239.136	119.887		2.96258	45.2719	77.5765	41.937
AT1G29880	80.5003	58.8258	178.18	105.835		53.3264	39.9458	73.6977	55.6566
AT2G36880	20.1251	134.459	187.557	114.047		396.985	2077.18	2459.18	1644.45
AT1G36732	189.751	50.4221	4.68894	81.6205		2.96258	61.2502	155.153	73.1219
AT1G36730	189.751	50.4221	4.68894	81.6205		2.96258	61.2502	155.153	73.1219
AT2G23670	112.125	168.074	0	93.3996		82.9521	63.9132	0	48.9551
AT2G03390	97.7503	67.2294	135.979	100.32		94.8025	15.9783	54.3036	55.0281
AT4G17170	51.7502	147.064	121.912	106.909		118.503	159.783	178.426	152.237
AT1G55310	77.6252	92.4405	140.668	103.578		94.8025	143.805	139.638	126.082
AT3G22170	140.875	92.4405	37.5115	90.2758		88.8773	95.8699	15.5153	66.7542
AT5G01800	74.7502	105.046	131.29	103.695		65.1767	117.174	143.517	108.623
AT5G64200	48.8752	100.844	178.18	109.3		62.2141	101.196	147.395	103.602
AT1G68490	2.87501	58.8258	300.092	120.598		2.96258	45.2719	193.941	80.7252
AT2G40060	89.1253	67.2294	150.046	102.134		272.557	234.349	310.306	272.404
AT5G42080	77.6252	121.853	107.846	102.441		165.904	250.327	263.76	226.664
AT5G27120	48.8752	4.20184	286.025	113.034		20.738	0	50.4247	23.7209
AT2G31400	2.87501	226.899	112.534	114.103		2.96258	95.8699	62.0612	53.6312
AT1G02145	149.5	100.844	14.0668	88.1371		177.755	42.6088	0	73.4545
AT5G42850	0	134.459	215.691	116.717		0	173.098	182.305	118.468
AT4G25672	92.0003	79.835	126.601	99.4788		41.4761	98.5329	96.9706	78.9932
AT4G25670	92.0003	79.835	126.601	99.4788		41.4761	98.5329	96.9706	78.9932
AT1G75270	51.7502	67.2294	206.313	108.431		17.7755	47.9349	131.88	65.8635
AT3G53430	123.625	134.459	14.0668	90.717		53.3264	53.261	3.87883	36.8221
AT5G35220	100.625	33.6147	164.113	99.4509		26.6632	18.6414	38.7883	28.0309
AT2G03640	74.7502	100.844	131.29	102.295		65.1767	63.9132	155.153	94.7477
AT5G63370	103.5	63.0276	126.601	97.7097		133.316	23.9675	372.367	176.55
AT2G27600	138	63.0276	70.334	90.454		115.54	74.5655	65.94	85.3487
AT2G46800	103.5	75.6331	112.534	97.2226		47.4012	47.9349	93.0918	62.8093
AT2G30170	161.001	75.6331	18.7557	85.1298		124.428	26.6305	7.75765	52.9388
AT5G06440	138	63.0276	70.334	90.454		124.428	103.859	81.4553	103.248
AT1G06220	28.7501	201.688	93.7787	108.072		17.7755	85.2177	23.273	42.0887
AT4G24350	97.7503	16.8074	187.557	100.705		35.5509	31.9566	46.5459	38.0178
AT3G44890	77.6252	214.294	0	97.3064		59.2515	117.174	0	58.8086
AT1G54610	120.75	37.8166	126.601	95.0561		106.653	162.446	174.547	147.882
AT1G10600	94.8753	189.083	0	94.6527		79.9896	87.8807	0	55.9568
AT4G02640	92.0003	84.0368	121.912	99.3165		65.1767	58.5871	232.73	118.831
AT5G17010	129.375	12.6055	140.668	94.2163		88.8773	87.8807	81.4553	86.0711
AT4G12040	103.5	126.055	56.2672	95.2742		225.156	245.001	248.245	239.467
AT3G23490	86.2503	50.4221	168.802	101.825		62.2141	31.9566	112.486	68.8856
AT3G15640	51.7502	252.11	0	101.287		77.027	159.783	7.75765	81.5226
AT1G29850	34.5001	218.496	65.6451	106.214		109.615	186.414	124.122	140.05
AT5G45510	109.25	109.248	65.6451	94.7144		59.2515	53.261	77.5765	63.363
AT5G14660	34.5001	176.477	112.534	107.837		8.88773	53.261	46.5459	36.2316
AT2G40400	86.2503	63.0276	154.735	101.338		5.92515	2.66305	11.6365	6.74156
AT2G15580	117.875	0	173.491	97.122		106.653	0	112.486	73.0462
AT5G05610	132.25	75.6331	65.6451	91.1762		65.1767	79.8916	38.7883	61.2855
AT2G44210	86.2503	126.055	84.4008	98.9021		396.985	245.001	473.217	371.734
AT4G26370	86.2503	67.2294	150.046	101.175		35.5509	26.6305	46.5459	36.2424
AT3G28080	86.2503	151.266	56.2672	97.9279		29.6258	15.9783	31.0306	25.5449
AT5G25770	77.6252	88.2386	140.668	102.177		97.765	135.816	34.9094	89.4967
AT4G32150	109.25	63.0276	117.223	96.5004		139.241	127.826	201.699	156.256
AT4G10040	40.2501	46.2202	248.514	111.661		38.5135	55.9241	128.001	74.1463
AT3G55630	34.5001	201.688	84.4008	106.863		35.5509	55.9241	46.5459	46.007
AT3G20390	60.3752	71.4313	187.557	106.455		239.969	231.686	221.093	230.916
AT3G01290	115	84.0368	84.4008	94.4793		11.8503	5.3261	15.5153	10.8972
AT2G41530	106.375	96.6423	84.4008	95.8062		121.466	111.848	131.88	121.731
AT1G54830	120.75	88.2386	70.334	93.1077		168.867	215.707	139.638	174.737
AT1G08930	11.5	310.936	0	107.479		5.92515	197.066	15.5153	72.8354
AT3G18190	97.7503	21.0092	178.18	98.9797		91.8399	5.3261	190.062	95.7428
AT4G33040	152.375	100.844	0	84.4065		121.466	66.5763	0	62.6806
AT3G23325	40.2501	71.4313	215.691	109.124		32.5883	31.9566	135.759	66.768
AT3G20230	115	67.2294	98.4677	93.5658		59.2515	45.2719	69.8189	58.1141
AT3G19030	198.376	0	37.5115	78.629		106.653	0	7.75765	38.1368
AT3G50740	60.3752	50.4221	206.313	105.703		0	0	0	0
AT3G03920	74.7502	117.652	107.846	100.082		26.6632	26.6305	23.273	25.5222
AT1G50920	66.1252	159.67	75.023	100.273		35.5509	71.9024	27.1518	44.8684
AT2G30440	71.8752	96.6423	135.979	101.499		82.9521	114.511	54.3036	83.9223
AT1G01820	106.375	67.2294	112.534	95.3797		79.9896	58.5871	108.607	82.3946
AT3G18820	117.875	0	168.802	95.559		183.68	66.5763	201.699	150.652
AT5G09650	94.8753	155.468	32.8226	94.3886		154.054	178.424	69.8189	134.099
AT2G36000	37.3751	67.2294	225.069	109.891		5.92515	37.2827	89.213	44.1403
AT2G30490	11.5	105.046	225.069	113.872		145.166	721.687	1508.86	791.905
AT1G80030	129.375	79.835	60.9562	90.0555		62.2141	15.9783	34.9094	37.7006
AT4G24920	69.0002	88.2386	150.046	102.428		121.466	207.718	193.941	174.375
AT1G79750	117.875	46.2202	117.223	93.773		106.653	66.5763	162.911	112.047
AT5G49720	175.376	0	75.023	83.4662		1179.11	7.98916	1000.74	729.277
AT5G49360	66.1252	138.661	98.4677	101.085		44.4387	87.8807	62.0612	64.7935
AT1G43890	181.126	8.40368	56.2672	81.9322		391.06	5.3261	100.849	165.745
AT5G42760	63.2502	46.2202	206.313	105.261		5.92515	15.9783	23.273	15.0588
AT4G35000	71.8752	218.496	0	96.7903		26.6632	117.174	0	47.9458
AT2G20990	77.6252	126.055	93.7787	99.153		74.0644	122.5	166.789	121.118
AT3G42050	2.87501	67.2294	276.647	115.584		213.306	85.2177	356.852	218.458
AT4G14030	2.87501	189.083	140.668	110.875		2.96258	215.707	213.335	144.002
AT4G22310	0	138.661	201.624	113.428		0	170.435	190.062	120.166
AT3G08030	120.75	42.0184	112.534	91.7677		385.135	181.088	333.579	299.934
AT2G01570	60.3752	172.275	65.6451	99.4319		68.1393	159.783	81.4553	103.126
AT5G25630	109.25	117.652	46.8894	91.2637		68.1393	79.8916	15.5153	54.5154
AT5G13120	129.375	130.257	0	86.5441		94.8025	50.598	0	48.4668
AT1G24575	109.25	25.211	150.046	94.8358		68.1393	21.3044	54.3036	47.9157
AT3G27380	0	151.266	187.557	112.941		17.7755	191.74	364.61	191.375
AT4G12030	11.5	201.688	112.534	108.574		97.765	404.784	418.913	307.154
AT2G26060	132.25	25.211	112.534	89.9986		35.5509	47.9349	139.638	74.3745
AT1G73230	66.1252	109.248	126.601	100.658		82.9521	98.5329	131.88	104.455
AT1G15140	77.6252	54.6239	168.802	100.35		79.9896	159.783	128.001	122.591
AT4G19640	140.875	113.45	0	84.775		204.418	175.761	0	126.726
AT1G67090	184.001	42.0184	9.37787	78.4656		47.4012	42.6088	7.75765	32.5892
AT1G64860	25.8751	184.881	107.846	106.201		0	50.598	50.4247	33.6742
AT2G21340	195.501	0	37.5115	77.6707		82.9521	5.3261	15.5153	34.5979
AT3G11510	0	319.34	0	106.447		5.92515	181.088	0	62.3376
AT1G06950	94.8753	92.4405	98.4677	95.2611		14.8129	26.6305	31.0306	24.158
AT5G57930	86.2503	117.652	84.4008	96.1009		41.4761	63.9132	62.0612	55.8168
AT4G26110	74.7502	151.266	65.6451	97.2205		88.8773	95.8699	23.273	69.34
AT2G36990	83.3753	58.8258	154.735	98.9786		41.4761	26.6305	46.5459	38.2175
AT1G75560	109.25	67.2294	103.157	93.2121		41.4761	117.174	108.607	89.0858
AT5G06310	215.626	0	0	71.8752		817.671	2.66305	0	273.445
AT2G43460	0	134.459	201.624	112.028		0	167.772	240.487	136.086
AT4G21620	123.625	100.844	37.5115	87.327		195.53	93.2068	42.6671	110.468
AT3G62560	66.1252	63.0276	173.491	100.881		112.578	79.8916	155.153	115.874
AT1G09780	48.8752	88.2386	173.491	103.535		47.4012	66.5763	221.093	111.69
AT4G02580	112.125	79.835	79.7119	90.5574		139.241	111.848	104.728	118.606
AT2G43530	123.625	0	150.046	91.2238		44.4387	0	77.5765	40.6717
AT5G19190	74.7502	92.4405	126.601	97.9307		8.88773	0	15.5153	8.13434
AT5G08530	135.125	109.248	9.37787	84.5837		254.782	138.479	3.87883	132.38
AT1G01240	86.2503	12.6055	196.935	98.597		151.091	111.848	267.639	176.86
AT3G50210	86.2503	37.8166	168.802	97.6228		133.316	111.848	139.638	128.267
AT5G05000	86.2503	50.4221	154.735	97.1357		26.6632	7.98916	139.638	58.0967
AT3G52730	186.876	42.0184	0	76.298		254.782	77.2285	0	110.67
AT3G53270	71.8752	105.046	117.223	98.0482		148.129	119.837	96.9706	121.646
AT5G06600	143.75	67.2294	42.2004	84.3934		201.455	122.5	46.5459	123.501
AT5G04440	74.7502	138.661	75.023	96.1446		38.5135	39.9458	50.4247	42.9613
AT2G16710	92.0003	37.8166	159.424	96.4136		112.578	34.6197	201.699	116.299
AT5G27830	112.125	88.2386	70.334	90.2327		71.1018	95.8699	139.638	102.203
AT1G20920	94.8753	117.652	65.6451	92.724		32.5883	79.8916	38.7883	50.4227
AT5G54900	14.375	134.459	178.18	109.004		17.7755	117.174	128.001	87.6503
AT4G00335	69.0002	37.8166	196.935	101.251		53.3264	39.9458	104.728	66.0001
AT4G25450	69.0002	75.6331	154.735	99.7894		35.5509	47.9349	69.8189	51.1016
AT4G16690	138	113.45	0	83.8167		17.7755	29.2936	0	15.6897
AT3G27820	192.626	12.6055	23.4447	76.2253		68.1393	5.3261	7.75765	27.0743
AT4G14040	23.0001	100.844	201.624	108.489		242.931	764.296	643.885	550.371
AT5G49630	100.625	113.45	60.9562	91.6771		8.88773	5.3261	112.486	42.2333
AT5G42390	83.3753	88.2386	117.223	96.2791		71.1018	42.6088	81.4553	65.0553
AT2G36680	94.8753	126.055	56.2672	92.3992		171.829	167.772	77.5765	139.059
AT2G27350	201.251	0	23.4447	74.8984		88.8773	13.3153	0	34.0642
AT1G13450	138	113.45	0	83.8167		88.8773	119.837	0	69.5715
AT1G07530	66.1252	75.6331	154.735	98.8311		47.4012	45.2719	62.0612	51.5781
AT4G05420	74.7502	92.4405	121.912	96.3677		88.8773	127.826	139.638	118.781
AT1G77180	40.2501	142.863	121.912	101.675		77.027	127.826	85.3342	96.7292
AT3G07630	28.7501	67.2294	225.069	107.016		35.5509	47.9349	178.426	87.3039
AT5G67390	103.5	0	178.18	93.8933		65.1767	15.9783	62.0612	47.7387
AT1G04640	80.5003	75.6331	131.29	95.8079		41.4761	10.6522	15.5153	22.5479
AT3G18500	80.5003	92.4405	112.534	95.1584		53.3264	37.2827	23.273	37.9607
AT4G02230	135.125	67.2294	51.5783	84.6444		124.428	66.5763	38.7883	76.5976
AT2G35840	126.5	67.2294	65.6451	86.4583		130.353	229.022	178.426	179.267
AT1G34180	51.7502	84.0368	168.802	101.53		41.4761	53.261	46.5459	47.0943
AT1G67840	120.75	92.4405	46.8894	86.6934		130.353	127.826	62.0612	106.747
AT3G15354	74.7502	172.275	32.8226	93.2827		26.6632	31.9566	19.3941	26.0046
AT3G47430	28.7501	147.064	135.979	103.931		2.96258	26.6305	7.75765	12.4502
AT5G11060	94.8753	79.835	103.157	92.6223		44.4387	37.2827	65.94	49.2205
AT1G67480	109.25	126.055	28.1336	87.813		100.728	95.8699	31.0306	75.876
AT1G04750	97.7503	151.266	18.7557	89.2574		260.707	383.479	15.5153	219.901
AT5G27350	109.25	138.661	14.0668	87.326		82.9521	154.457	11.6365	83.0152
AT3G63500	103.5	100.844	65.6451	89.9965		77.027	95.8699	31.0306	67.9758
AT2G46340	100.625	84.0368	89.0898	91.2506		50.3638	74.5655	73.6977	66.209
AT1G31800	135.125	33.6147	89.0898	85.9433		65.1767	13.3153	108.607	62.3664
AT5G11330	74.7502	88.2386	126.601	96.53		38.5135	69.2394	96.9706	68.2412
AT4G18740	97.7503	84.0368	93.7787	91.8553		53.3264	90.5438	31.0306	58.3003
AT2G22240	63.2502	109.248	121.912	98.1368		165.904	687.067	628.37	493.78
AT5G65490	204.126	0	9.37787	71.1678		314.033	0	3.87883	105.971
AT4G15490	89.1253	88.2386	98.4677	91.9439		79.9896	61.2502	89.213	76.8176
AT1G33120	0	306.734	0	102.245		0	159.783	0	53.261
AT1G68440	112.125	92.4405	56.2672	86.9444		44.4387	47.9349	65.94	52.7712
AT2G29320	74.7502	12.6055	206.313	97.8896		47.4012	34.6197	50.4247	44.1485
AT3G44880	92.0003	71.4313	112.534	91.9887		23.7006	47.9349	50.4247	40.6868
AT4G31310	106.375	75.6331	84.4008	88.8031		17.7755	58.5871	27.1518	34.5048
AT2G24180	94.8753	92.4405	84.4008	90.5722		32.5883	23.9675	31.0306	29.1955
AT1G48900	74.7502	29.4129	187.557	97.2402		65.1767	45.2719	155.153	88.5339
AT1G77960	140.875	100.844	0	80.5732		0	2.66305	0	0.887684
AT1G34370	80.5003	50.4221	154.735	95.2191		124.428	39.9458	197.82	120.731
AT5G62680	109.25	117.652	32.8226	86.5748		112.578	127.826	77.5765	105.994
AT4G10080	138	42.0184	70.334	83.451		71.1018	42.6088	38.7883	50.833
AT4G39970	140.875	0	112.534	84.47		85.9147	0	89.213	58.3759
AT3G48420	115	113.45	28.1336	85.5279		53.3264	63.9132	34.9094	50.7164
AT2G19830	126.5	63.0276	65.6451	85.0577		198.493	63.9132	58.1824	106.863
AT1G30360	138	50.4221	60.9562	83.1262		281.445	133.153	166.789	193.796
AT3G15210	86.2503	84.0368	103.157	91.1479		269.594	266.305	248.245	261.382
AT2G20360	126.5	75.6331	46.8894	83.0076		189.605	111.848	42.6671	114.707
AT1G60000	60.3752	130.257	93.7787	94.8036		44.4387	111.848	38.7883	65.025
AT4G21980	126.5	117.652	0	81.384		154.054	276.957	3.87883	144.963
AT2G28720	5.75002	88.2386	229.758	107.916		5.92515	34.6197	85.3342	41.9597
AT5G62430	109.25	105.046	42.2004	85.4989		41.4761	37.2827	7.75765	28.8388
AT3G59940	92.0003	163.872	4.68894	86.8537		29.6258	47.9349	0	25.8536
AT1G18150	138	100.844	0	79.6149		165.904	122.5	7.75765	98.7208
AT2G44065	63.2502	84.0368	140.668	95.985		94.8025	37.2827	100.849	77.6449
AT4G36760	92.0003	16.8074	168.802	92.5364		71.1018	85.2177	54.3036	70.2077
AT3G27300	51.7502	63.0276	182.869	99.2154		115.54	111.848	209.457	145.615
AT4G39330	97.7503	159.67	0	85.8067		88.8773	90.5438	0	59.807
AT5G37720	57.5002	50.4221	187.557	98.4932		47.4012	58.5871	85.3342	63.7742
AT4G21450	34.5001	0	281.336	105.279		11.8503	0	193.941	68.5972
AT5G54430	100.625	54.6239	112.534	89.2612		168.867	130.49	224.972	174.776
AT1G44750	0	176.477	140.668	105.715		17.7755	159.783	128.001	101.853
AT5G10070	97.7503	117.652	46.8894	87.4304		47.4012	31.9566	31.0306	36.7962
AT3G04600	112.125	126.055	14.0668	84.0824		88.8773	119.837	0	69.5715
AT2G21385	184.001	8.40368	28.1336	73.5126		71.1018	0	15.5153	28.8724
AT1G01540	92.0003	50.4221	131.29	91.2375		106.653	69.2394	224.972	133.621
AT4G26860	120.75	126.055	0	82.2685		91.8399	31.9566	0	41.2655
AT5G63670	80.5003	63.0276	135.979	93.169		32.5883	34.6197	151.274	72.8274
AT4G32340	155.25	75.6331	0	76.9612		11.8503	15.9783	0	9.27621
AT2G23350	83.3753	126.055	60.9562	90.1289		47.4012	39.9458	38.7883	42.0451
AT5G18100	63.2502	92.4405	131.29	95.6603		41.4761	50.598	54.3036	48.7925
AT2G46230	132.25	42.0184	75.023	83.0973		195.53	63.9132	93.0918	117.512
AT5G05740	132.25	25.211	93.7787	83.7467		41.4761	79.8916	46.5459	55.9712
AT5G11860	57.5002	33.6147	206.313	99.1427		106.653	63.9132	190.062	120.209
AT2G31070	63.2502	88.2386	135.979	95.8227		5.92515	0	3.87883	3.26799
AT1G09840	138	0	112.534	83.5116		355.509	127.826	209.457	230.931
AT4G36210	86.2503	138.661	42.2004	89.0371		94.8025	263.642	34.9094	131.118
AT4G31780	161.001	33.6147	37.5115	77.3756		41.4761	5.3261	77.5765	41.4596
AT1G08830	0	109.248	215.691	108.313		35.5509	697.72	1008.49	580.588
AT5G47080	129.375	100.844	14.0668	81.4288		124.428	39.9458	34.9094	66.4278
AT5G08180	97.7503	54.6239	117.223	89.8659		32.5883	39.9458	42.6671	38.4004
AT5G03380	103.5	151.266	0	84.9222		88.8773	90.5438	0	59.807
AT5G55530	60.3752	63.0276	168.802	97.4015		88.8773	117.174	290.912	165.655
AT5G35460	120.75	96.6423	32.8226	83.4051		121.466	93.2068	38.7883	84.4869
AT5G02230	201.251	8.40368	0	69.8848		53.3264	0	0	17.7755
AT4G24440	86.2503	92.4405	93.7787	90.8232		106.653	69.2394	38.7883	71.5601
AT3G59020	103.5	109.248	46.8894	86.5458		65.1767	79.8916	7.75765	50.942
AT3G42790	54.6252	96.6423	140.668	97.3119		71.1018	69.2394	221.093	120.478
AT1G53580	138	100.844	0	79.6149		314.033	250.327	0	188.12
AT1G16730	129.375	113.45	0	80.9417		2.96258	13.3153	0	5.42595
AT1G14380	51.7502	25.211	225.069	100.677		888.773	268.968	1664.02	940.586
AT1G22710	143.75	75.6331	14.0668	77.8168		139.241	151.794	15.5153	102.183
AT2G20420	60.3752	155.468	60.9562	92.2665		71.1018	141.142	135.759	116.001
AT1G21680	54.6252	113.45	117.223	95.0994		23.7006	87.8807	69.8189	60.4667
[truncated: 17,117 more rows]
